# Supplementary material for: Increase in pore size and gas uptake capacity in indium-organic framework materials
Source: Royal Society of Chemistry journal article supplement (doi:10.1039/c3ta11548h), 2013-01-01
Supplement: c3ta11548h.pdf [file c3ta11548h.pdf]

## SUPPORTING INFORMATION

Increase in pore size and gas uptake capacity in indium-organic framework material.

*Jinjie Qian,<sup>a,b</sup> Feilong Jiang,<sup>a</sup> Daqiang Yuan,<sup>a</sup> Xingjun Li,<sup>a,b</sup> Linjie Zhang,<sup>a,b</sup>  
Kongzhao Su,<sup>a,b</sup> and Maochun Hong<sup>\*a</sup>*

<sup>†</sup>Key Laboratory of Optoelectronic Materials Chemistry and Physics, State Key Laboratory of Structure Chemistry, Fujian Institute of Research on the Structure of Matter, Chinese Academy of Sciences, Fuzhou, Fujian, 350002, China

<sup>§</sup>Graduate School of the Chinese Academy of Sciences, Beijing, 100049, China

*\*To whom correspondence should be addressed: E-mail:[hmc@fjirsm.ac.cn](mailto:hmc@fjirsm.ac.cn); Fax: +86-591-83794946; Tel: +86-591-83792460*

## Table of Contents

|                                                                  |         |
|------------------------------------------------------------------|---------|
| <b>Section S1. General Experimental Procedures</b>               | S2-S5   |
| <b>Section S2. Single-Crystal X-ray Crystallography</b>          | S6-S7   |
| <b>Section S3. Additional Structural and Topological Figures</b> | S8-S9   |
| <b>Section S4. Powder X-Ray Diffraction</b>                      | S10     |
| <b>Section S5. TGA Plots</b>                                     | S11     |
| <b>Section S6. Elemental Analysis</b>                            | S11     |
| <b>Section S7. Gas Sorption Test</b>                             | S12-S17 |
| <b>Section S8. Heat of Adsorption</b>                            | S18-S25 |
| <b>Section S9. Sorption data for InOF-2-Li<sup>+</sup></b>       |         |
| • H <sub>2</sub> uptake measurements                             | S26-S30 |
| • CO <sub>2</sub> uptake measurements                            | S31-S34 |
| • CH <sub>4</sub> uptake measurements                            | S35-S38 |
| • N <sub>2</sub> uptake measurements                             | S39     |
| <b>Section S10. References</b>                                   | S40     |

## S1. General Experimental Procedures

### 1.1. Research background of InOF-2

When repeating the preparation of the solvated framework complex  $[\text{Me}_2\text{NH}_2][\text{In}(\text{BPTC})]$  (labelled as **InOF-0** here) under the solvothermal conditions reported by Martin Schröder group,<sup>S1</sup> interestingly, we increased the molar ratio of metal salts  $\text{In}(\text{NO}_3)_3$  and BPTC ligands to 4:1, thus to get a highly water-stable indium-organic framework  $[\text{In}_2(\text{OH})_2(\text{BPTC})] \cdot 6\text{H}_2\text{O}$  (**InOF-1**), which is recently published in Chem. Commun..<sup>S2</sup> Under the exactly same conditions described in the former paper, however, sometimes very few of new crystals, an isomeric structure of the compound **InOF-0** with totally different shape confirmed by single crystal X-ray diffraction analysis (Figure. S1), were obtained. Therefore a lot of effort has been directed towards looking for the most optimized conditions of preparing this new crystal, and this process is concluded in Table S1.

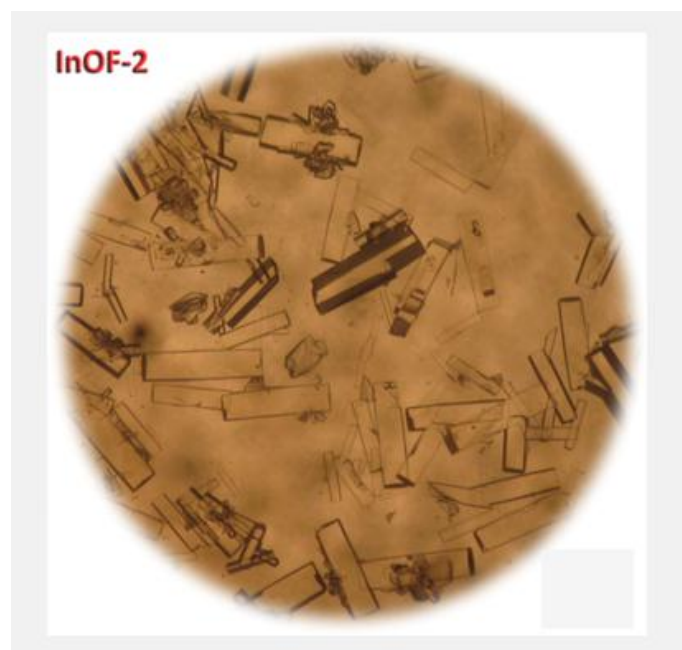

**Figure S1.** Photograph of **InOF-2** under lab microscope.

## 1.2. Search for the Most Optimized Conditions for InOF-2.

Table S1. A series of conditions were tested, including metal salt, Metal:Ligand (M:L) molar ratio, concentration, reaction time etc., to look for the most optimized conditions for InOF-2.

### Optimised conditions for InOF-2

| Salt                                                                                | Batch | M:L ratio | Solvents                               | Concentration | Results                         | Notes                                                                                                                                                                      |
|-------------------------------------------------------------------------------------|-------|-----------|----------------------------------------|---------------|---------------------------------|----------------------------------------------------------------------------------------------------------------------------------------------------------------------------|
|    | 1     | 2.0:1.0   | DMF/CH <sub>3</sub> CN                 | 5 ml/5 ml     | ◆ , Pure & good quality, InOF-0 | *Temp(°C)=85;<br>*Reaction time=7 days;<br>*All reactions with an additional 0.2 ml HNO <sub>3</sub> (65 wt<br>*Obtained crystals in good quality was in <b>BOLD</b> type. |
|                                                                                     | 2     | 1.0:1.0   | DMF/CH <sub>3</sub> CN                 | 5 ml/5 ml     | ◆ , Pure & good quality, InOF-0 |                                                                                                                                                                            |
|                                                                                     | 3     | 1.0:2.0   | DMF/CH <sub>3</sub> CN                 | 5 ml/5 ml     | Precipitate                     |                                                                                                                                                                            |
|                                                                                     | 4     | 1.0:1.0   | DMF/CH <sub>3</sub> CN                 | 2.5 ml/7.5 ml | Precipitate                     |                                                                                                                                                                            |
|                                                                                     | 5     | 1.0:1.0   | DMF/CH <sub>3</sub> CN                 | 7.5 ml/2.5 ml | ◆ , Tiny & good quality, InOF-0 |                                                                                                                                                                            |
|                                                                                     | 6     | 1.0:1.0   | DMF                                    | 10 ml         | Tiny & poor quality, InOF-0     |                                                                                                                                                                            |
|                                                                                     | 7     | 1.0:1.0   | CH <sub>3</sub> CN                     | 10 ml         | Precipitate                     |                                                                                                                                                                            |
| InCl <sub>3</sub>                                                                   | 8     | 1.0:1.0   | DMF/CH <sub>3</sub> OH                 | 5 ml/5 ml     | Precipitate                     |                                                                                                                                                                            |
|  | 9     | 1.0:1.0   | DMF/CH <sub>3</sub> CH <sub>2</sub> OH | 5 ml/5 ml     | Precipitate                     |                                                                                                                                                                            |
|                                                                                     | 10    | 1.0:1.0   | DMF/1,4-dioxane                        | 5 ml/5 ml     | ◆ , Pure & good quality, InOF-0 |                                                                                                                                                                            |
|                                                                                     | 11    | 1.0:1.0   | DMF/THF                                | 5 ml/5 ml     | ◆ , Pure & good quality, InOF-0 |                                                                                                                                                                            |
|                                                                                     | 12    | 1.0:1.0   | DMA/CH <sub>3</sub> CN                 | 5 ml/5 ml     | Clear                           |                                                                                                                                                                            |
|                                                                                     | ★13   | 1.0:1.0   | DEF/CH <sub>3</sub> CN                 | 5 ml/5 ml     | ■ , Pure & good quality, InOF-2 |                                                                                                                                                                            |
|                                                                                     | 14    | 1.0:1.0   | DMA                                    | 10 ml         | Tiny & poor quality, InOF-0     |                                                                                                                                                                            |
|                                                                                     | 15    | 1.0:1.0   | DEF                                    | 10 ml         | Tiny & poor quality, InOF-2     |                                                                                                                                                                            |

| Salt                                                                                | Batch | M:L ratio | Solvents                               | Concentration | Results                         | Notes                                                                                                                                                                      |
|-------------------------------------------------------------------------------------|-------|-----------|----------------------------------------|---------------|---------------------------------|----------------------------------------------------------------------------------------------------------------------------------------------------------------------------|
|  | 16    | 1.0:1.0   | DMF/CH <sub>3</sub> CN                 | 5 ml/5 ml     | ◆ , Pure & good quality, InOF-0 | *Temp(°C)=85;<br>*Reaction time=7 days;<br>*All reactions with an additional 0.2 ml HNO <sub>3</sub> (65 wt<br>*Obtained crystals in good quality was in <b>BOLD</b> type. |
|                                                                                     | 17    | 1.0:1.0   | DMF/CH <sub>3</sub> CN                 | 4 ml/4 ml     | ◆ , Pure & good quality, InOF-0 |                                                                                                                                                                            |
|                                                                                     | 18    | 1.0:1.0   | DMF/CH <sub>3</sub> CN                 | 3 ml/3 ml     | ◆ , Pure & good quality, InOF-0 |                                                                                                                                                                            |
|                                                                                     | 19    | 1.0:1.0   | DMF/CH <sub>3</sub> CN                 | 2.5 ml/7.5 ml | Precipitate                     |                                                                                                                                                                            |
|                                                                                     | 20    | 1.0:1.0   | DMF/CH <sub>3</sub> CN                 | 7.5 ml/2.5 ml | Tiny & poor quality, InOF-0     |                                                                                                                                                                            |
|                                                                                     | 21    | 1.0:1.0   | DMF                                    | 10 ml         | Tiny & poor quality, InOF-0     |                                                                                                                                                                            |
|                                                                                     | 22    | 1.0:1.0   | CH <sub>3</sub> CN                     | 10 ml         | Precipitate                     |                                                                                                                                                                            |
| In(NO <sub>3</sub> ) <sub>3</sub>                                                   | 23    | 1.0:1.0   | DMF/CH <sub>3</sub> OH                 | 5 ml/5 ml     | Precipitate                     |                                                                                                                                                                            |
|  | 24    | 1.0:1.0   | DMF/CH <sub>3</sub> CH <sub>2</sub> OH | 5 ml/5 ml     | Precipitate                     |                                                                                                                                                                            |
|                                                                                     | 25    | 1.0:1.0   | DMF/1,4-dioxane                        | 5 ml/5 ml     | ◆ , Pure & good quality, InOF-0 |                                                                                                                                                                            |
|                                                                                     | 26    | 1.0:1.0   | DMF/THF                                | 5 ml/5 ml     | Tiny & Poor quality, InOF-0     |                                                                                                                                                                            |
|                                                                                     | 27    | 1.0:1.0   | DMA/CH <sub>3</sub> CN                 | 5 ml/5 ml     | Tiny & poor quality, InOF-0     |                                                                                                                                                                            |
|                                                                                     | 28    | 1.0:1.0   | DEF/CH <sub>3</sub> CN                 | 5 ml/5 ml     | Tiny & poor quality, InOF-2     |                                                                                                                                                                            |
|                                                                                     | 29    | 1.0:1.0   | DMA                                    | 10 ml         | Tiny & Poor quality, InOF-0     |                                                                                                                                                                            |
|                                                                                     | 30    | 1.0:1.0   | DEF                                    | 10 ml         | Tiny & poor quality, InOF-2     |                                                                                                                                                                            |
|                                                                                     | 31    | 4.0:1.0   | DMF/CH <sub>3</sub> CN                 | 5 ml/5 ml     | ◆ , Pure & good quality, InOF-1 |                                                                                                                                                                            |

★ The most optimised conditions of InOF-2 as reported in the manuscript.

|                                                                                                              |                                                      |
|--------------------------------------------------------------------------------------------------------------|------------------------------------------------------|
| InOF-0=Me <sub>2</sub> NH <sub>2</sub> [In(BPTC)].(DMF).(CH <sub>3</sub> CN).(H <sub>2</sub> O) <sub>4</sub> | Reported by Martin Schröder (DOI: 10.1039/b814155j). |
| InOF-1=[In <sub>2</sub> (OH) <sub>2</sub> (BPTC)].6H <sub>2</sub> O                                          | Reported by our group (DOI: 10.1039/c2cc35068h).     |
| InOF-2= Et <sub>2</sub> NH <sub>2</sub> [In(BPTC)].5H <sub>2</sub> O                                         | Reported in this work. (CCDC No.= 928842)            |

### 1.3. Materials and Methods.

All the reactions were carried in 23 ml glass vials under autogenous pressure. All the reactants are of reagent-grade quality and used as purchased commercially without further purification. The power X-ray diffraction patterns (PXRD) and Variable-temperature X-ray Diffraction (VT-XRD) were collected by a Rigaku D/MAX2500 X-ray diffractometer using Cu K $\alpha$  radiation ( $\lambda=0.154$  nm). Thermogravimetric analyses (TGA) were recorded on a NETZSCH STA 449C unit at a heating rate of 10 °C·min<sup>-1</sup> under flowing nitrogen atmosphere. Thermogravimetric analysis-mass spectrometry (TGA-MS) experiments had been performed on a NETZSCH STA 449C-QMS 403 C. Single gas adsorption measurements were performed in the ASAP (Accelerated Surface Area and Porosimetry) 2020 System. Elemental analyses for C, H, N were carried out on a German Elementary Vario EL III instrument. Inductively coupled plasma OES spectrometer (ICP) was tested on a Jobin Yvon Ultima2.

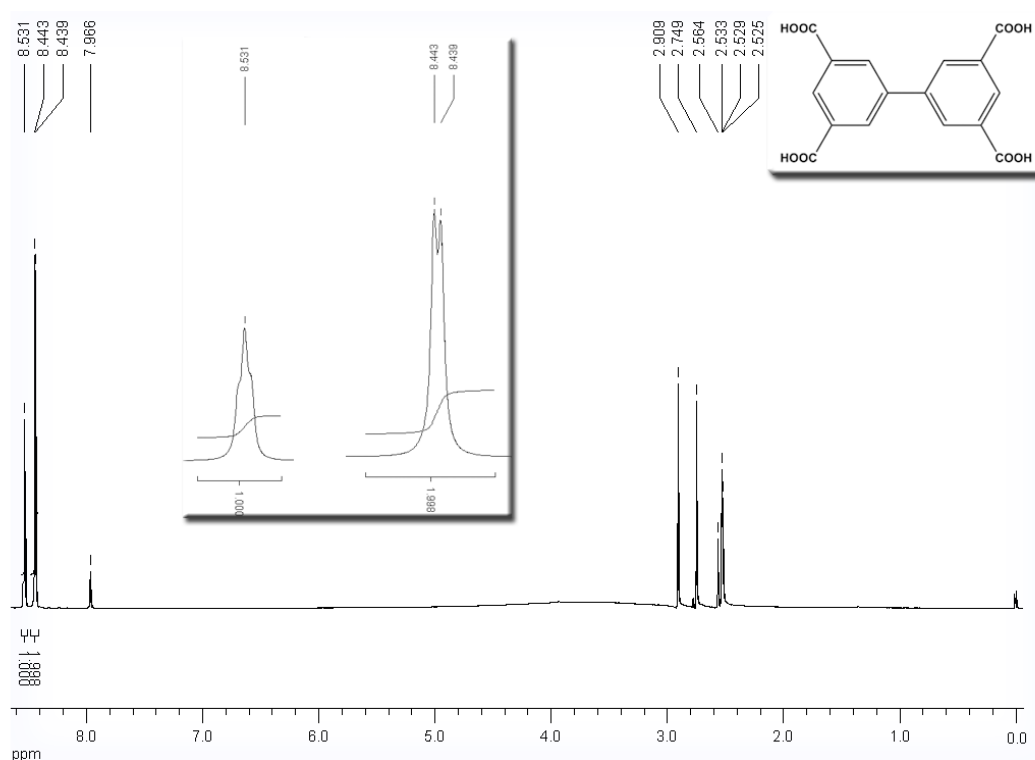

**Figure S2.** <sup>1</sup>H-NMR spectrum of the H<sub>4</sub>BPTC ligand was measured in DMSO-d<sub>6</sub>.

#### 1.4. Synthesis of $[\text{Et}_2\text{NH}_2][\text{In}(\text{BPTC})]\cdot 5\text{H}_2\text{O}$ (**InOF-2**).

A mixture of  $\text{InCl}_3\cdot 4\text{H}_2\text{O}$  (0.10 mmol, 22 mg) and  $\text{H}_4\text{BPTC}$  (0.10 mmol, 33 mg,  $\text{H}_4\text{BPTC}$  = Biphenyl-3,3',5,5'-tetracarboxylic acid) in  $N,N'$ -diethylformamide (DEF) (5 ml) and  $\text{CH}_3\text{CN}$  (5 ml) with an additional  $\text{HNO}_3$  (0.2 ml, 65 wt %) was sealed in a 23 ml glass vial, which was heated at 85 °C for 7 days, and cooled down to room-temperature. After washed by fresh  $\text{C}_2\text{H}_5\text{OH}$ , the light yellow bulk crystals (**InOF-2**,  $M=605$ ) were obtained in *ca.* 50% yield based on the BPTC ligand. Elemental analysis was calculated for **InOF-2**: C, 39.69%; H, 4.66%; N, 2.31%. Found: C, 39.98%; H, 4.52%; N, 1.99%. The phase purity of the sample was confirmed by powder X-ray diffraction (PXRD) and more details are shown below in Section S4.

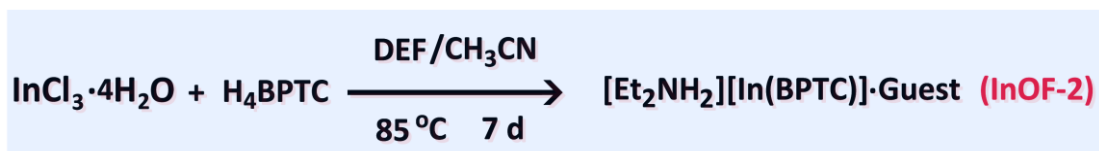

**Scheme S1.** The synthesis of **InOF-2**.

## S2. Single-Crystal X-ray Crystallography

The structures data of compound **InOF-2** was collected on a Rigaku Mercury CCD diffractometer equipped with a graphite-monochromated Mo K $\alpha$  radiation ( $\lambda=0.71073\text{\AA}$ ) at room temperature and the structure was resolved by the direct method and refined by full-matrix least-squares fitting on  $F^2$  by SHELX-97.<sup>S3</sup> The hydrogen atoms of the water molecules were found in the electron density map and refined by riding. Crystallographic data and structure refinement parameters at 298 and 333 K for **InOF-2** are listed in Table S2. We employed PLATON/SQUEEZE<sup>S4</sup> to calculate the contribution to the diffraction from the solvent region and thereby produced a set of solvent-free diffraction intensities. The final formula was calculated from the SQUEEZE<sup>S4</sup> results combined with elemental analysis data and TGA data. More details on the crystallographic studies as well as atomic displacement parameters are given in Supporting Information as CIF files. Crystallographic data for the structures reported in this paper have been deposited. The following crystal structure has been deposited at the Cambridge Crystallographic Data Centre and allocated the deposition number (CCDC No.) 928842 for **InOF-2**.

**Table S2. Crystal Data and Structure Refinement for InOF-2 at 298 K and 333**

**K.**

| Items                                                                 | InOF-2-T298K                                                    | InOF-2-T333K                                                    | InOF-2-Li <sup>+</sup> -T298K                                   |
|-----------------------------------------------------------------------|-----------------------------------------------------------------|-----------------------------------------------------------------|-----------------------------------------------------------------|
| chemical formula                                                      | C <sub>8</sub> H <sub>3</sub> In <sub>0.50</sub> O <sub>4</sub> | C <sub>8</sub> H <sub>3</sub> In <sub>0.50</sub> O <sub>4</sub> | C <sub>8</sub> H <sub>3</sub> In <sub>0.50</sub> O <sub>4</sub> |
| formula mass                                                          | 220.51                                                          | 220.51                                                          | 220.51                                                          |
| crystal system                                                        | Tetragonal                                                      | Tetragonal                                                      | Tetragonal                                                      |
| space group                                                           | <i>I</i> 4 <sub>3</sub> 2 <sub>1</sub> 2 (#. 96)                | <i>I</i> 4 <sub>1</sub> 2 <sub>1</sub> 2 (#. 92)                | <i>I</i> 4 <sub>1</sub> 2 <sub>1</sub> 2 (#. 92)                |
| <i>a</i> (Å)                                                          | 17.8210(5)                                                      | 17.9238(3)                                                      | 17.7549(1)                                                      |
| <i>b</i> (Å)                                                          | 17.8210(5)                                                      | 17.9238(3)                                                      | 17.7549(1)                                                      |
| <i>c</i> (Å)                                                          | 11.2345(6)                                                      | 11.0545(3)                                                      | 11.2325(1)                                                      |
| $\alpha$ (°)                                                          | 90.00                                                           | 90.00                                                           | 90.00                                                           |
| $\beta$ (°)                                                           | 90.00                                                           | 90.00                                                           | 90.00                                                           |
| $\gamma$ (°)                                                          | 90.00                                                           | 90.00                                                           | 90.00                                                           |
| unit cell volume                                                      | 3567.9(2)                                                       | 3551.5 (1)                                                      | 3540.82(4)                                                      |
| temperature (K)                                                       | 298(2)                                                          | 333(2)                                                          | 298(2)                                                          |
| <i>Z</i>                                                              | 8                                                               | 8                                                               | 8                                                               |
| F(000)                                                                | 860                                                             | 860                                                             | 860                                                             |
| no. of reflections measured                                           | 22976                                                           | 10824                                                           | 10646                                                           |
| no. of independent reflections                                        | 3116                                                            | 3126                                                            | 3351                                                            |
| R <sub>int</sub>                                                      | 0.0335                                                          | 0.0500                                                          | 0.0371                                                          |
| final R1 values ( <i>I</i> >2σ( <i>I</i> ))                           | 0.0228                                                          | 0.0389                                                          | 0.0365                                                          |
| final wR ( <i>F</i> <sup>2</sup> ) values ( <i>I</i> >2σ( <i>I</i> )) | 0.0663                                                          | 0.0869                                                          | 0.1322                                                          |
| goodness of fit on <i>F</i> <sup>2</sup>                              | 1.133                                                           | 0.975                                                           | 1.028                                                           |
| flack parameter                                                       | 0.00(2)                                                         | 0.00(2)                                                         | 0.00(2)                                                         |



### S3. Additional X-ray Crystal Structural and Topological Figures

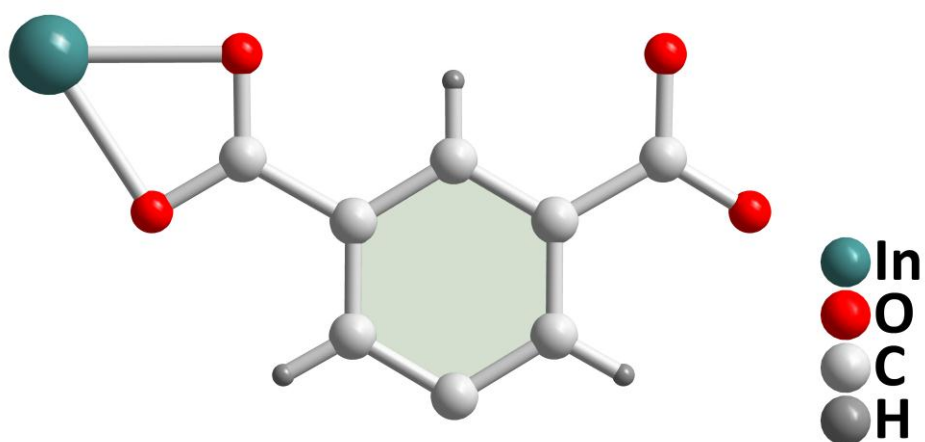

**Figure S3.** The asymmetric unit of **InOF-2**.

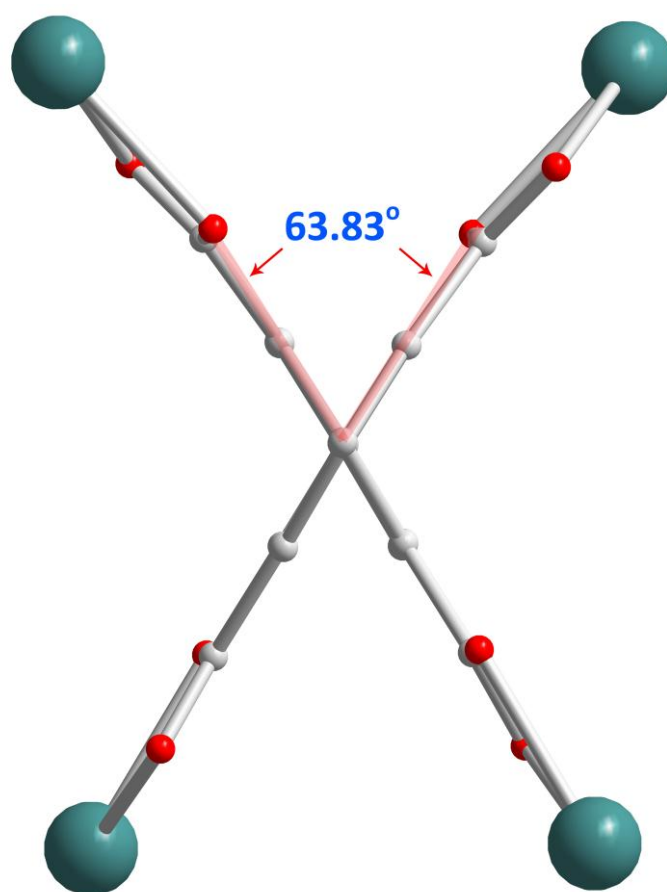

**Figure S4.** The dihedral angle of BPTC ligand with a value of 63.83° observed in **InOF-2** at 298 K.

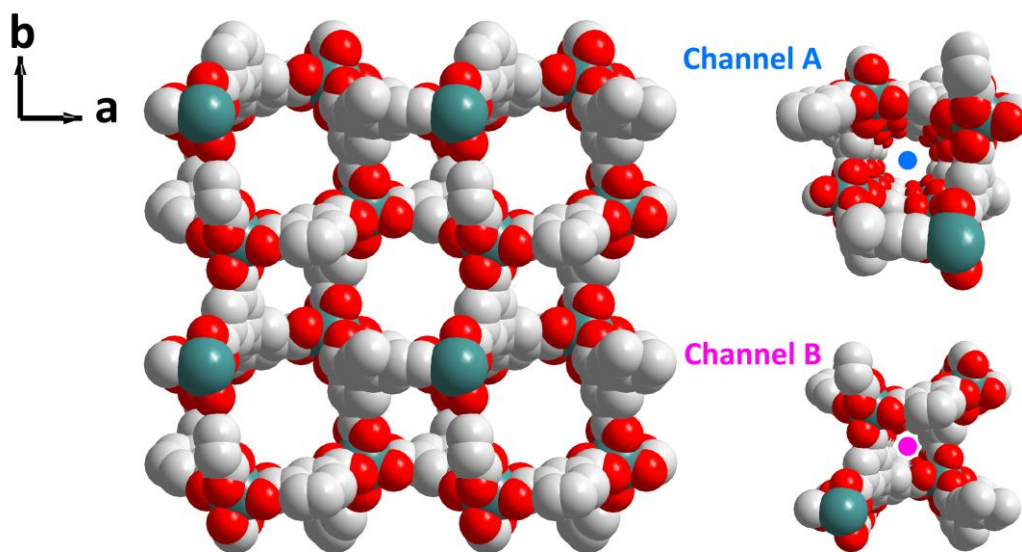

**Figure S5.** A space-filling view of **InOF-2** along the *c* axis, which consists of two kinds of channels, that is, Channel-A and Channel-B.

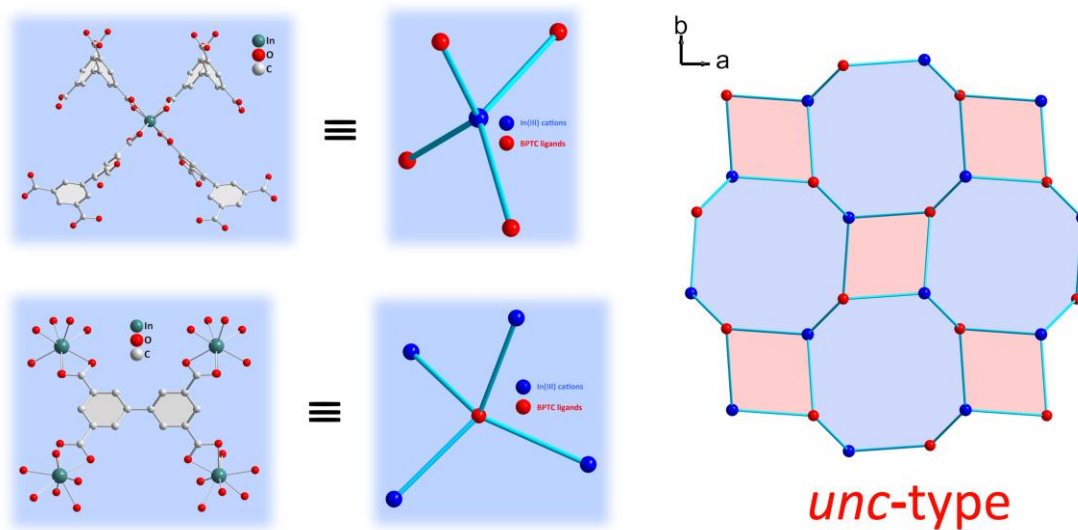

**Figure S6.** Topological analysis shows that this compound is uninodal *unc*-type three-dimensional network where 4-connected In(III) nodes and 4-connected BPTC nodes are topologically equal.

## S4. Powder X-Ray Diffraction

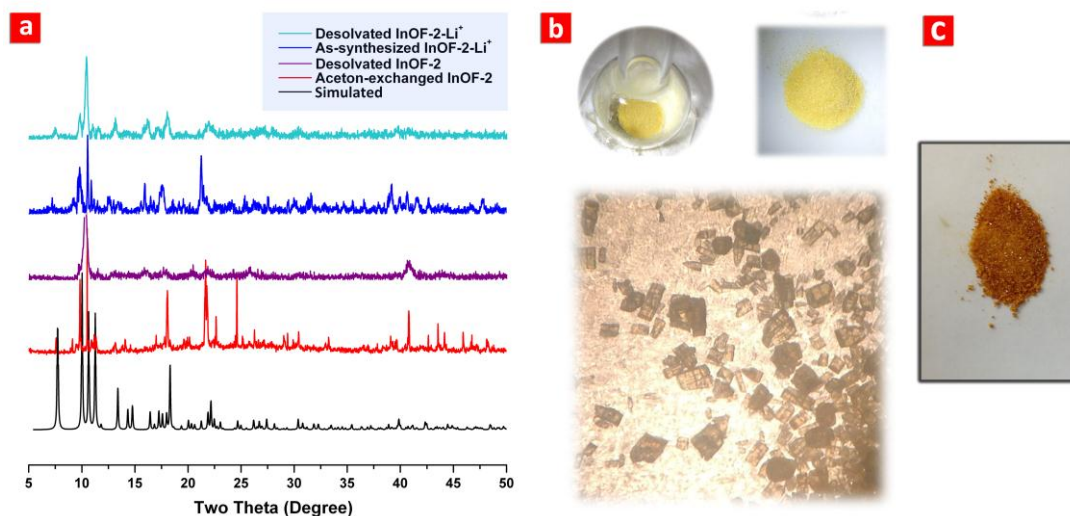

**Figure S7.** a) PXRD patterns for simulated **InOF-2**, acetone-exchanged **InOF-2**, desolvated **InOF-2**, as-synthesized Li<sup>+</sup>-exchanged **InOF-2-Li<sup>+</sup>**, and desolvated **InOF-2-Li<sup>+</sup>**. b) Photograph of activated **InOF-2** materials at 373 K, under lab microscope. c) Photograph of activated **InOF-2** materials at 473 K.

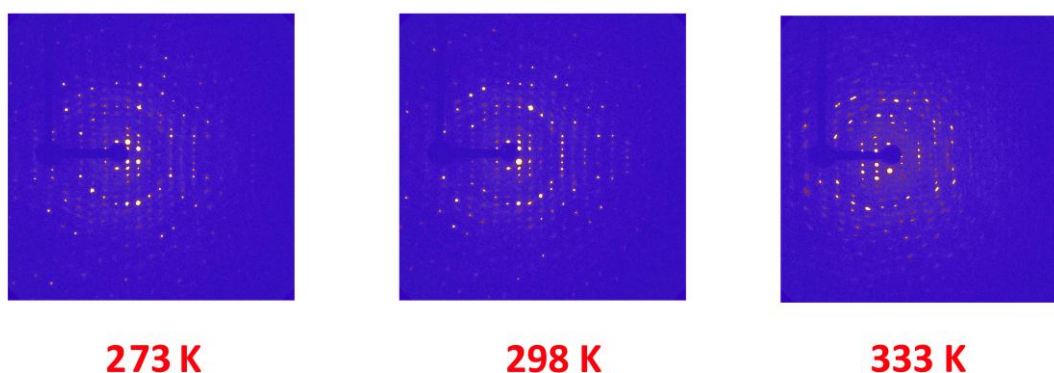

**Figure S8.** Bragg diffraction peaks of **InOF-2** at 273(2), 298(2), and 333(2) K.

## S5. Thermal Gravimetric Plots

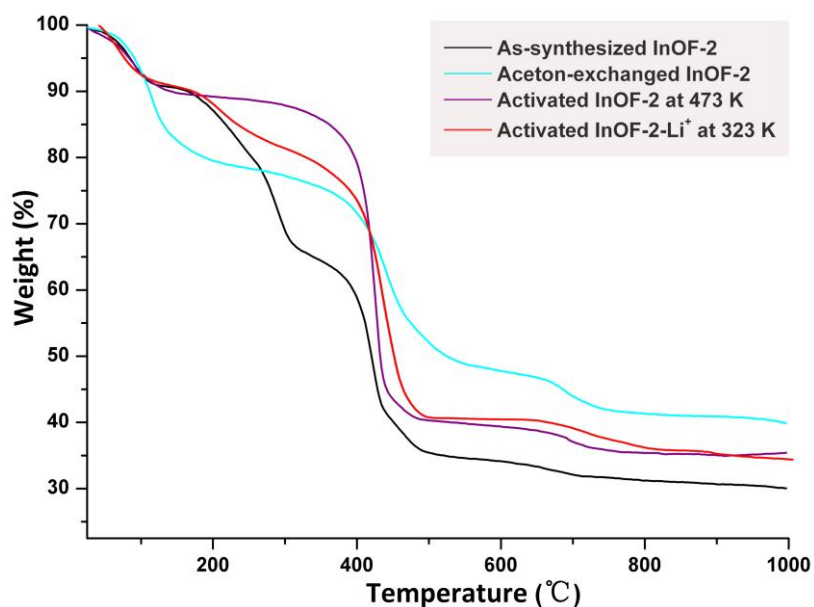

**Figure S9.** Thermal gravimetric analysis (TGA) for **InOF-2** with different treatment.

## S6. Elemental Analysis

**Table S3.** Elemental analysis of **InOF-2** with different treatment.

|                                 | <b>C(%)</b>  | <b>H(%)</b> | <b>N(%)</b> | <b>Li<sup>+</sup>(%)</b> |
|---------------------------------|--------------|-------------|-------------|--------------------------|
| <b>Calculated</b>               | <b>39.69</b> | <b>4.66</b> | <b>2.31</b> | <b>0</b>                 |
| <b>As-synthesized</b>           | <b>39.98</b> | <b>4.52</b> | <b>1.99</b> | <b>0</b>                 |
| <b>Acetone-exchanged</b>        | <b>40.65</b> | <b>4.39</b> | <b>1.87</b> | <b>0</b>                 |
| <b>Li<sup>+</sup>-exchanged</b> | <b>34.71</b> | <b>3.88</b> | <b>0</b>    | <b>1.12</b>              |

## S7 Gas Sorption Test

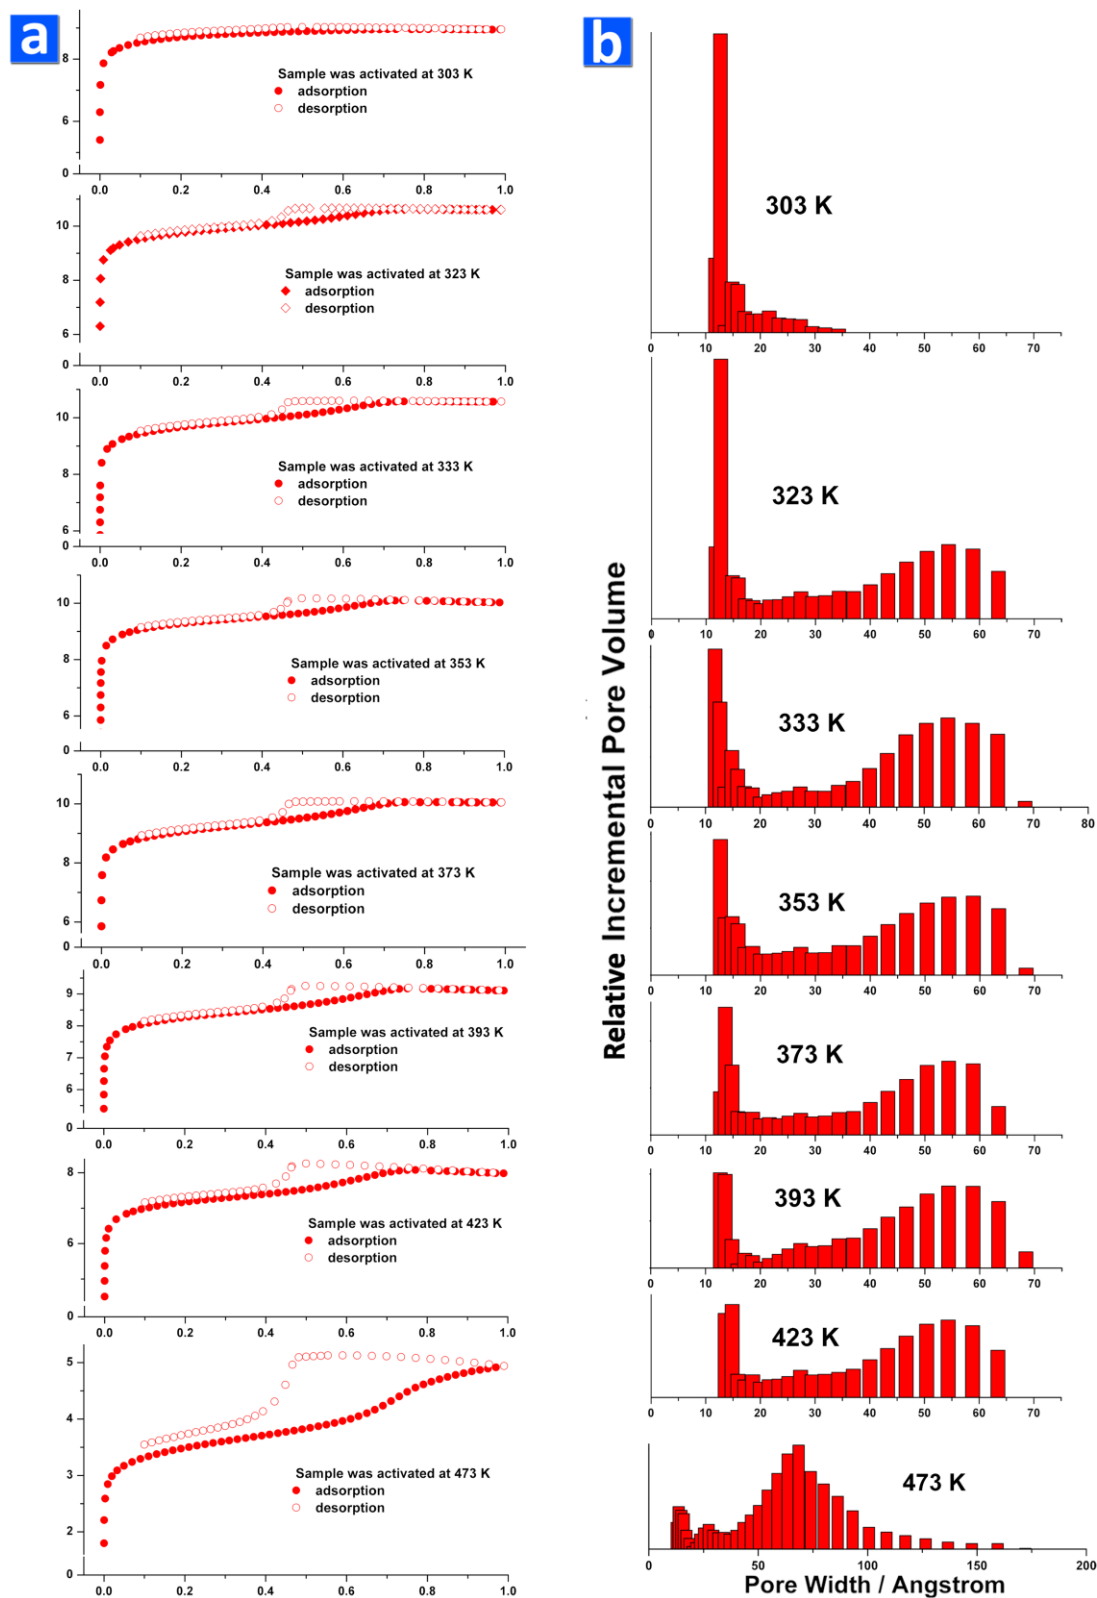

Figure S10.  $N_2$  sorption isotherms at 77 K and pore size distribution of InOF-2 sample at different activation temperature.

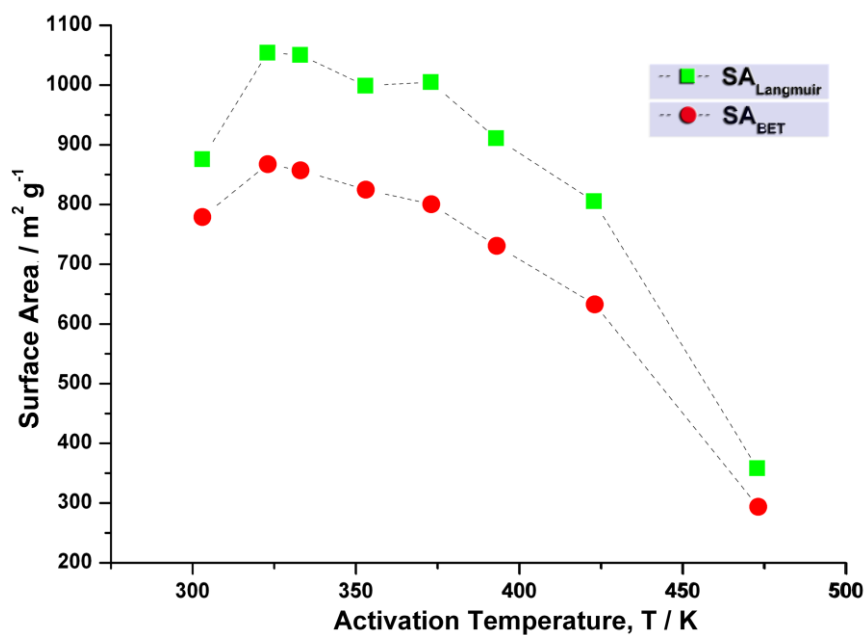

**Figure S11.** Brunauer-Emmett-Teller (BET) and Langmuir surface area of **InOF-2** sample at different activation temperature.

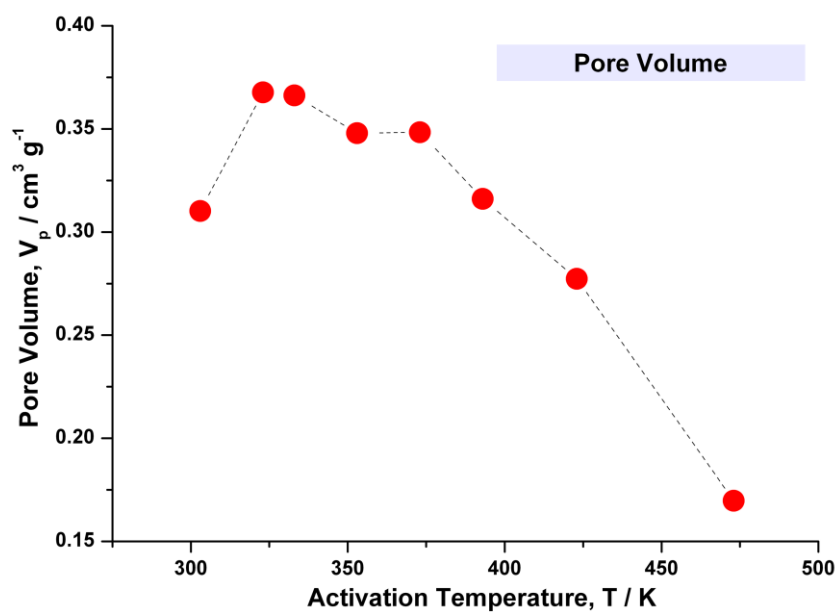

**Figure S12.** Pore volume of **InOF-2** sample at different activation temperature.

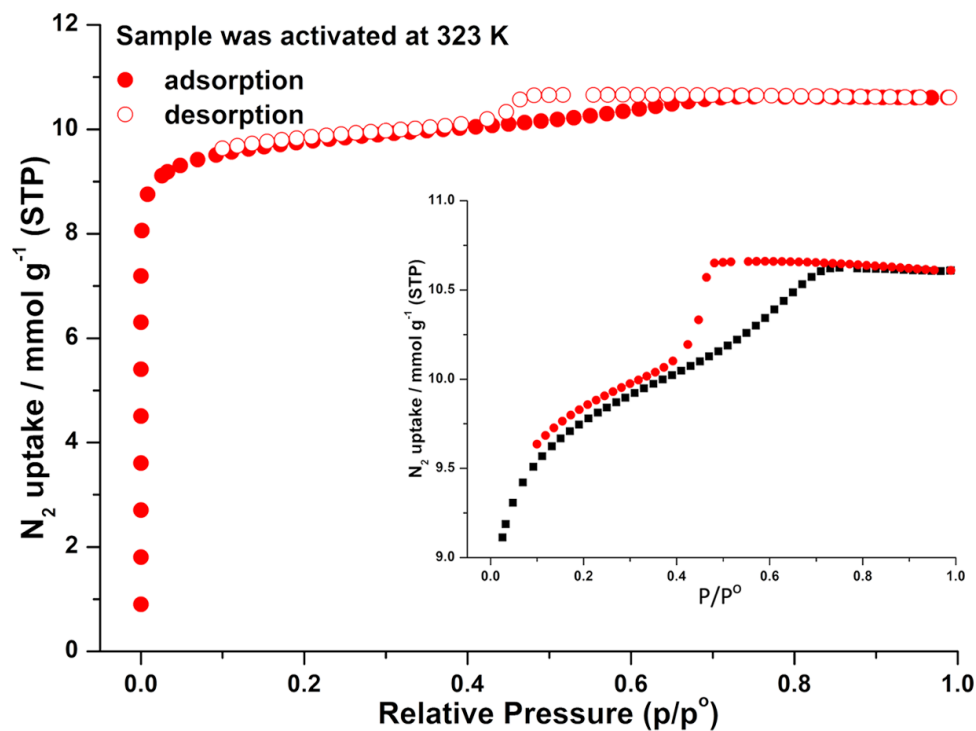

Figure S13.  $N_2$  sorption isotherms of **InOF-2** sample at 77 K activated under 323 K.

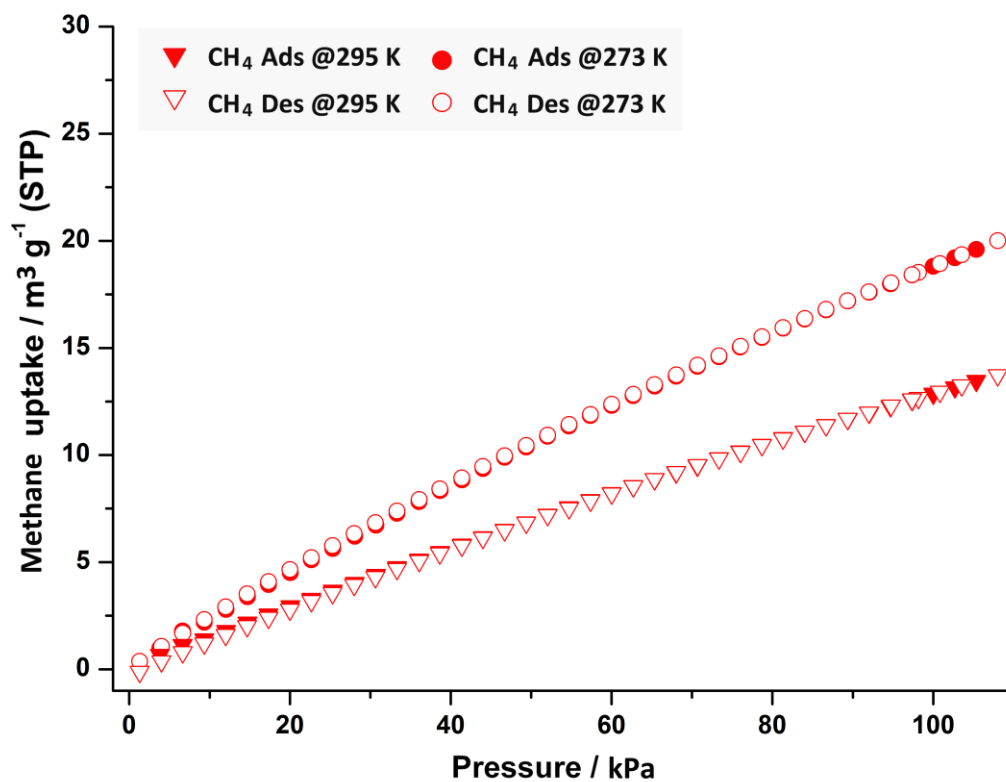

Figure S14.  $\text{CH}_4$  sorption isotherms of **InOF-2** sample at 273/295 K activated under 323 K.

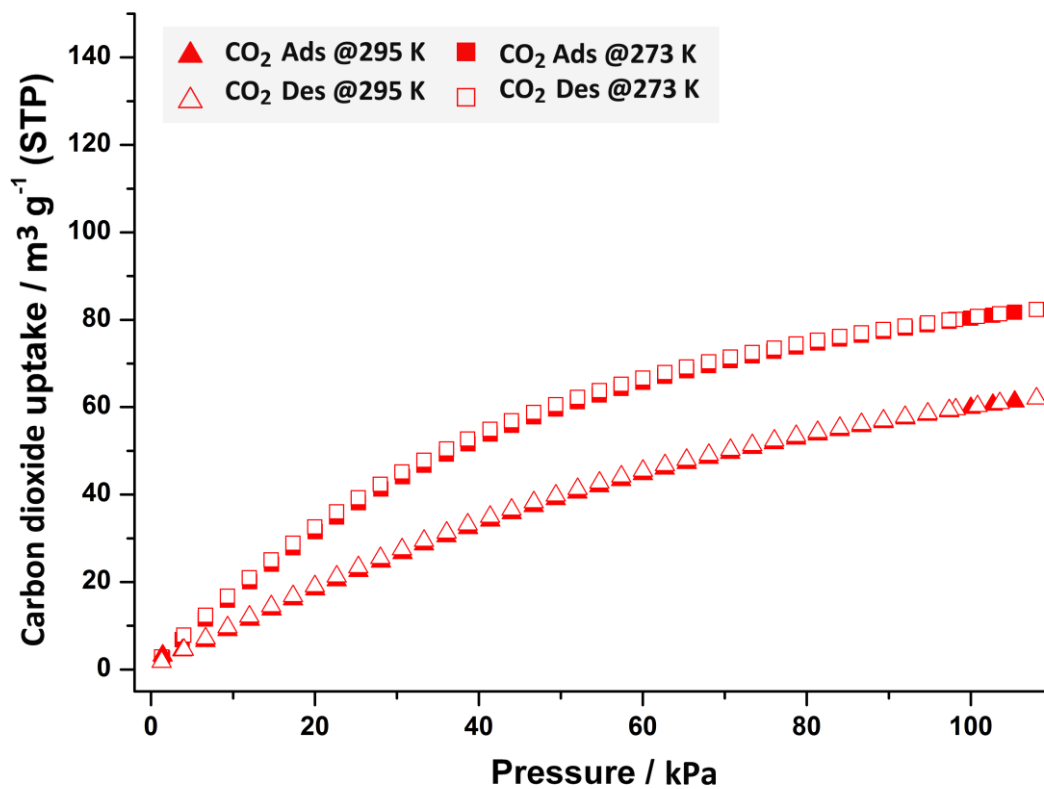

Figure S15. CO<sub>2</sub> sorption isotherms of InOF-2 sample at 273/295 K activated under 323 K.



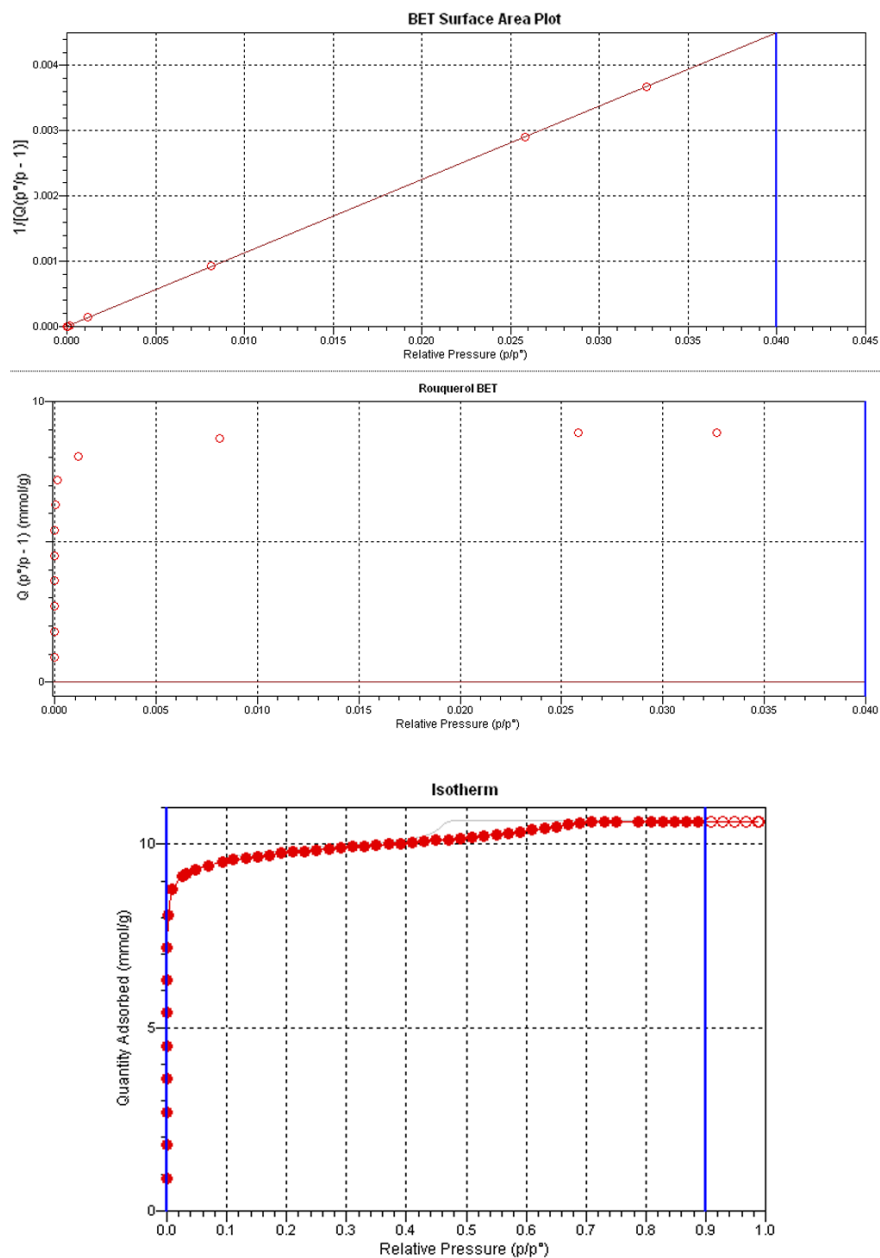

#### Summary

BET Surface Area:  $867.2084 \pm 1.4137 \text{ m}^2/\text{g}$   
Slope:  $0.112510 \pm 0.000183 \text{ g}/\text{mmol}$   
Y-Intercept:  $0.000004 \pm 0.000002 \text{ g}/\text{mmol}$   
C: 26698.396892  
Qm: 8.88779 mmol/g  
Correlation Coefficient: 0.9999867  
Molecular Cross-Sectional Area:  $0.1620 \text{ nm}^2$

InOF-2

**Figure S16:** The BET surface area report of **InOF-2** sample obtained by  $\text{N}_2$  adsorption data at 77 K on MicroActive Version 1.01.

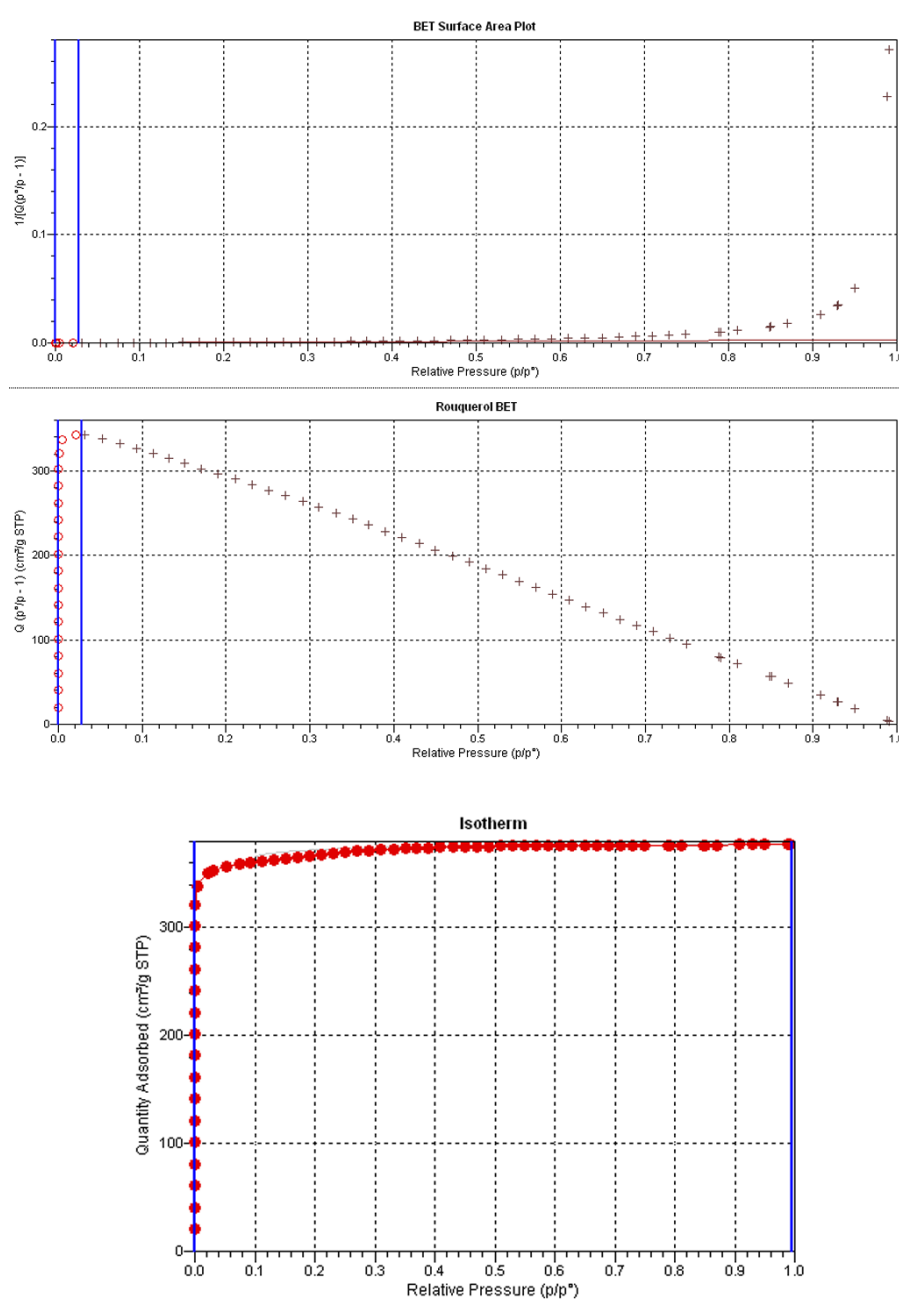

#### Summary

BET Surface Area:  $1494.7277 \pm 1.3297$  m<sup>2</sup>/g  
Slope:  $0.002912 \pm 0.000003$  g/cm<sup>2</sup> STP  
Y-Intercept:  $0.000000 \pm 0.000000$  g/cm<sup>2</sup> STP  
C: 29811.296660  
Qm: 343.3631 cm<sup>3</sup>/g STP  
Correlation Coefficient: 0.9999937  
Molecular Cross-Sectional Area: 0.1620 nm<sup>2</sup>

InOF-2-Li<sup>+</sup>

**Figure S17:** The BET surface area report of InOF-2-Li<sup>+</sup> sample obtained by N<sub>2</sub> adsorption data at 77 K on MicroActive Version 1.01.

## S8. Heat of Adsorption ( $\text{kJ mol}^{-1}$ )

$\text{CO}_2$  and  $\text{CH}_4$  isotherms measured at 273 K and 296 K for **InOF-1** were fit to the following Equation 1.<sup>S5</sup>

The adsorption isostere is represented by

$$\ln (P/P_0) = q_i/RT + C \quad (1)$$

where

$q_i$  = isosteric heat of adsorption

$C$  = unknown constant

The isosteric heat of adsorption,  $q_i$  is determined by finding the slope of  $\ln (P/P_0)$  as a function of  $1/RT$  for a set of isotherms measured at different temperatures.

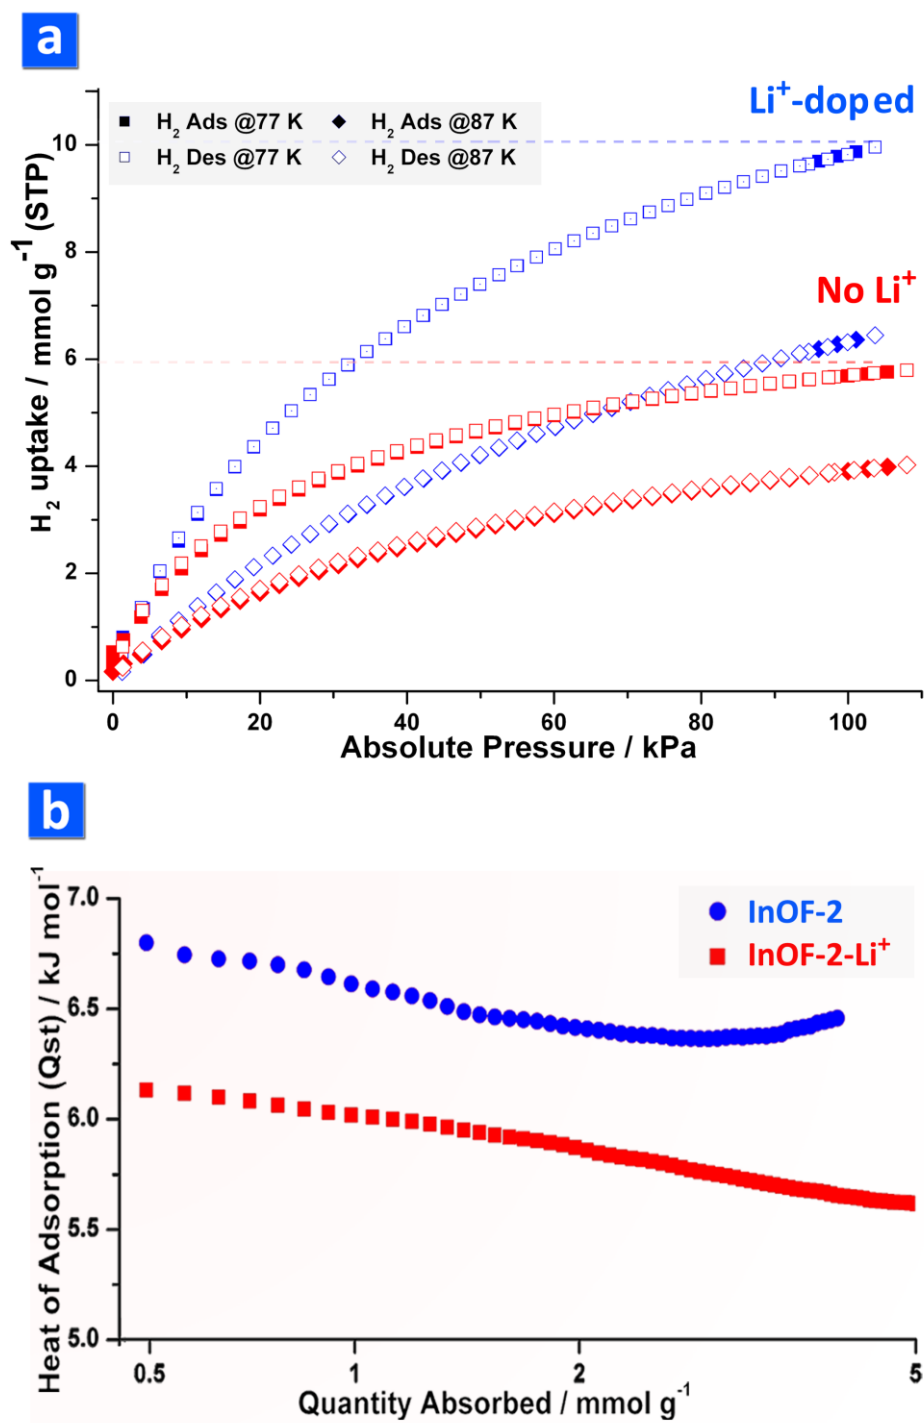

**Figure S18.** a) CO<sub>2</sub> adsorption isotherms for InOF-2-Li<sup>+</sup> (blue) and InOF-2 (red) at 77 K and 87 K. b) the heat of adsorption (Q<sub>st</sub>)

### Calculation of heats of adsorption for CO<sub>2</sub>

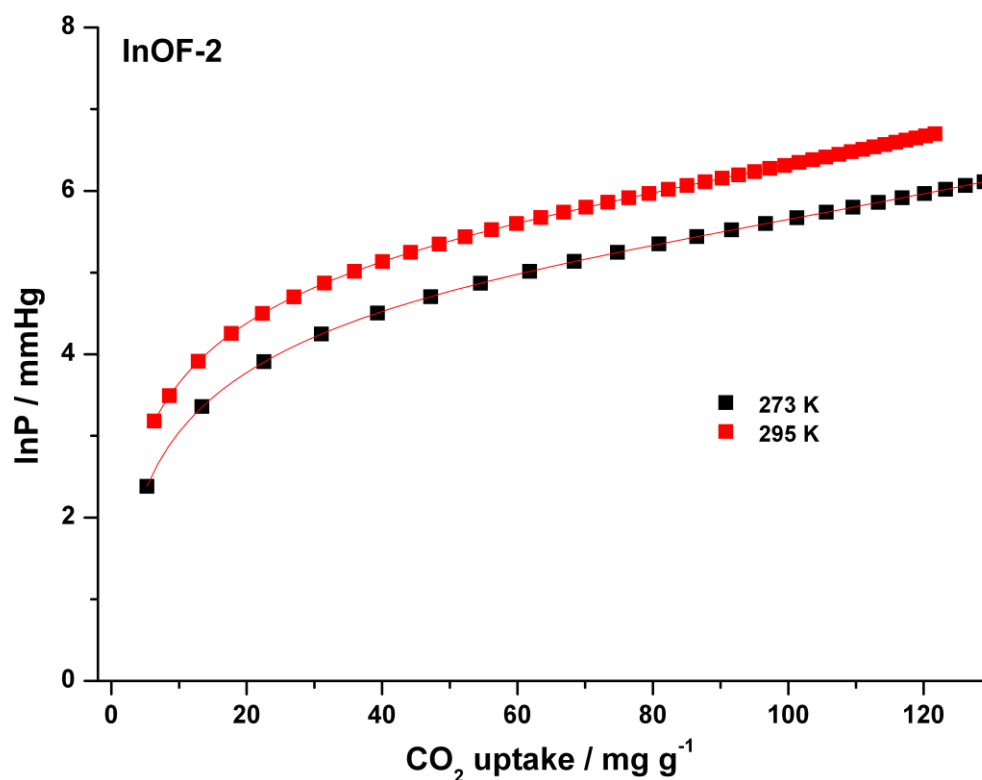

**Figure S19.** Nonlinear curve fitting of CO<sub>2</sub> adsorption isotherms for **InOF-2** at 273 K and 295 K.

$$y = \ln(x) + 1/k * (a_0 + a_1*x + a_2*x^2 + a_3*x^3 + a_4*x^4 + a_5*x^5) + (b_0 + b_1*x + b_2*x^2)$$

|          |            | Value              | Standard Error     |
|----------|------------|--------------------|--------------------|
| ln(P)    | <b>a0*</b> | <b>-2221.42826</b> | <b>4.61757</b>     |
|          | <b>a1*</b> | <b>1.83873</b>     | <b>0.14911</b>     |
|          | <b>a2*</b> | <b>-0.06162</b>    | <b>0.00167</b>     |
|          | <b>a3*</b> | <b>3.11424E-4</b>  | <b>2.39228E-5</b>  |
|          | <b>a4*</b> | <b>-1.35467E-6</b> | <b>1.56065E-7</b>  |
|          | <b>a5*</b> | <b>2.73145E-9</b>  | <b>3.69064E-10</b> |
|          | <b>b0*</b> | <b>8.83193</b>     | <b>0.01628</b>     |
|          | <b>b1*</b> | <b>-8.43667E-4</b> | <b>5.33023E-4</b>  |
|          | <b>b2*</b> | <b>1.27395E-4</b>  | <b>3.78012E-6</b>  |
|          | <b>k</b>   | <b>273</b>         | <b>0</b>           |
| <b>k</b> | <b>295</b> | <b>0</b>           |                    |

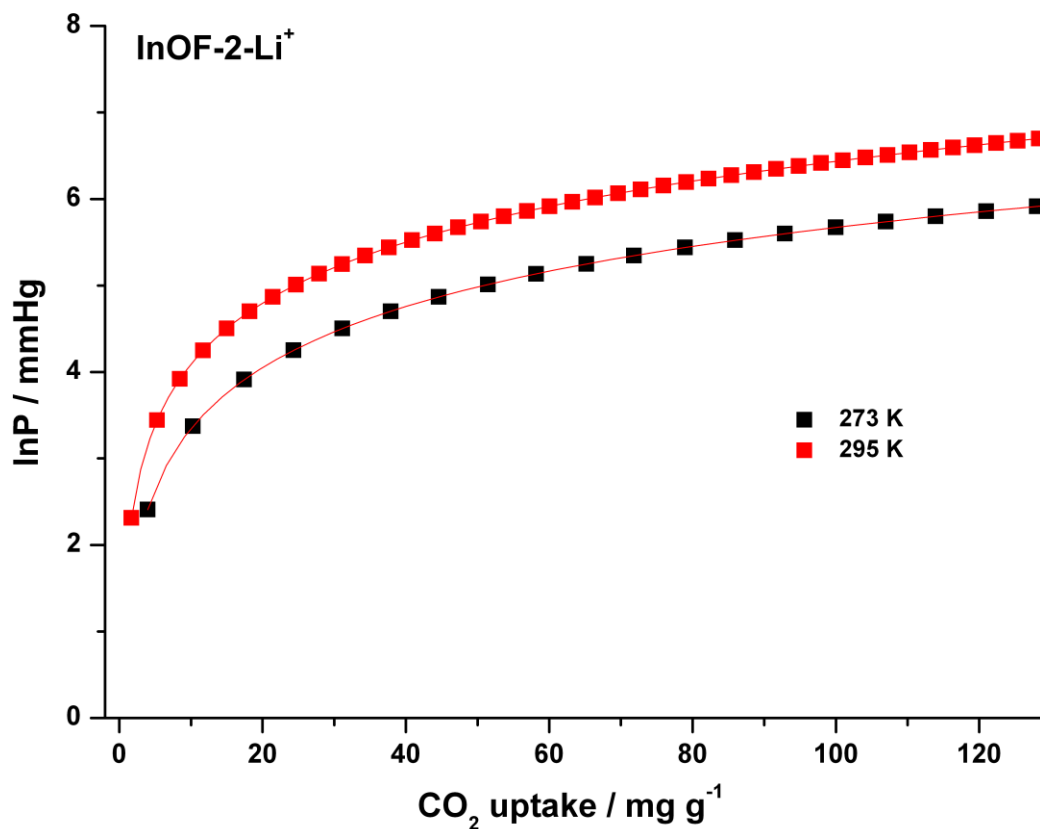

**Figure S20.** Nonlinear curve fitting of CO<sub>2</sub> adsorption isotherms for **InOF-2-Li<sup>+</sup>** at 273 K and 295 K.

$$y = \ln(x) + 1/k * (a_0 + a_1 * x + a_2 * x^2 + a_3 * x^3 + a_4 * x^4 + a_5 * x^5) + (b_0 + b_1 * x + b_2 * x^2)$$

|       |     | Value       | Standard Error |
|-------|-----|-------------|----------------|
| ln(P) | a0* | -2736.1694  | 1.52512        |
|       | a1* | 1.02104     | 0.05146        |
|       | a2* | -0.01924    | 4.19228E-4     |
|       | a3* | 4.13623E-5  | 1.76414E-6     |
|       | a4* | -1.11969E-7 | 7.56561E-9     |
|       | a5* | 1.35806E-10 | 1.16922E-11    |
|       | b0* | 11.05166    | 0.00529        |
|       | b1* | -0.00195    | 1.74105E-4     |
|       | b2* | 4.47838E-5  | 1.21454E-6     |
|       | k   | 273         | 0              |
| k     | 295 | 0           |                |

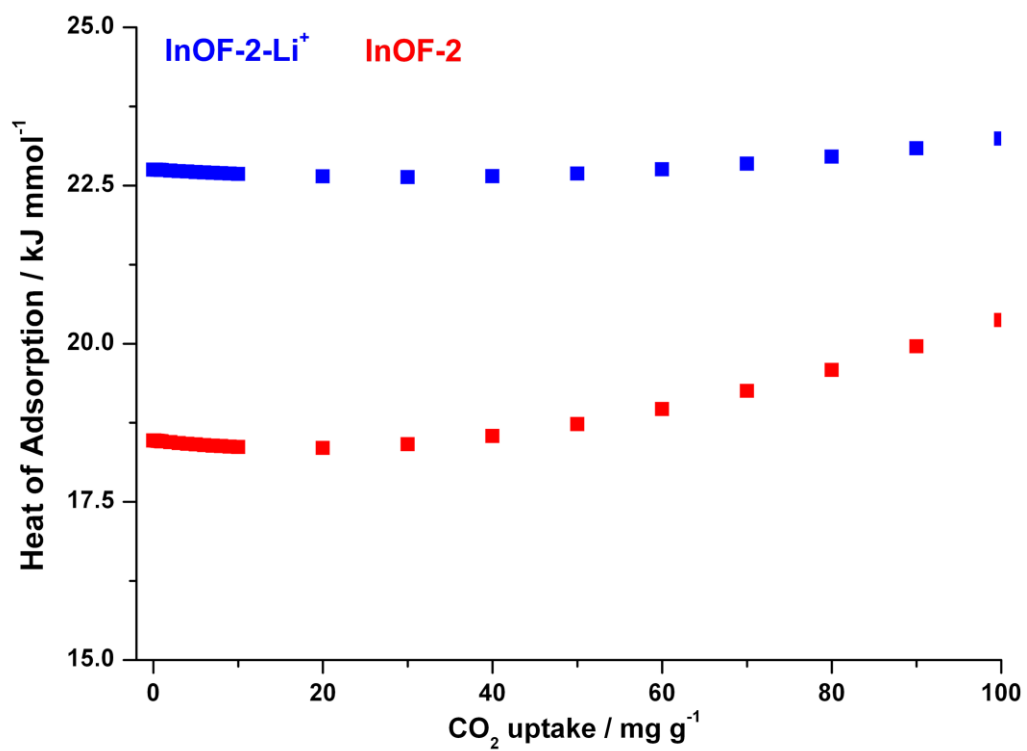

Figure S21. CO<sub>2</sub> heat of adsorption for InOF-2-Li<sup>+</sup> (blue) and InOF-2 (red).

### Calculation of heats of adsorption for CH<sub>4</sub>

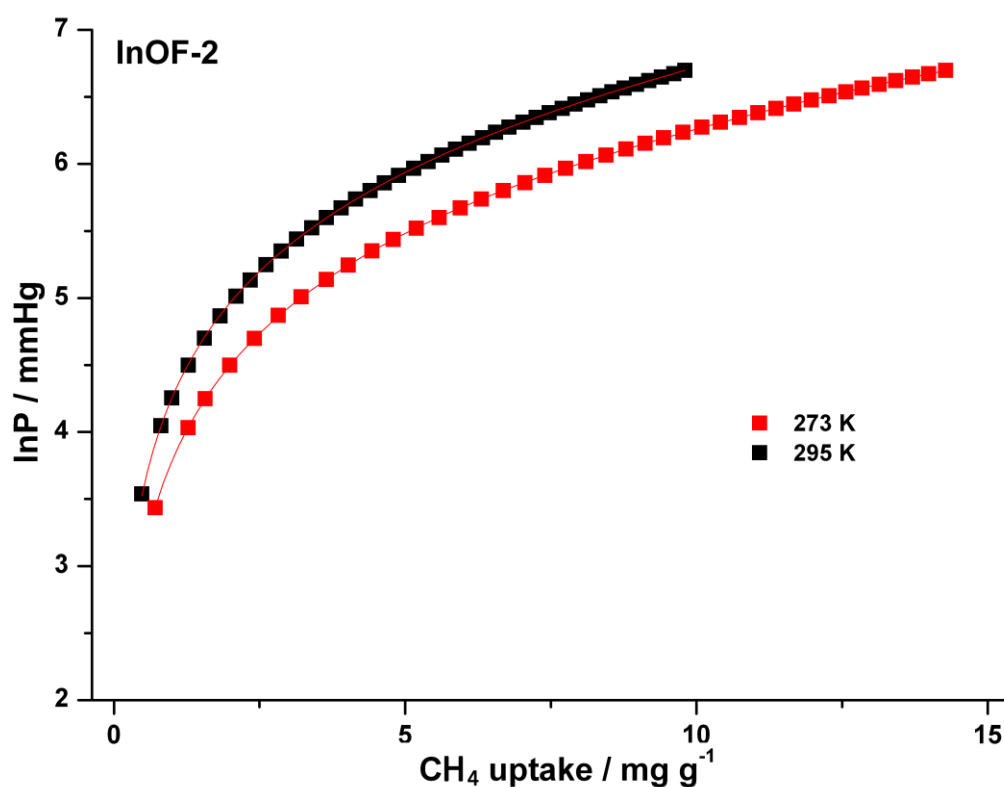

**Figure S22.** Nonlinear curve fitting of CH<sub>4</sub> adsorption isotherms for **InOF-2** at 273 K and 295 K.

$$y = \ln(x) + 1/k * (a_0 + a_1*x + a_2*x^2 + a_3*x^3 + a_4*x^4 + a_5*x^5) + (b_0 + b_1*x + b_2*x^2)$$

|       |     | Value       | Standard Error |
|-------|-----|-------------|----------------|
| ln(P) | a0* | -1760.71152 | 11.3503        |
|       | a1* | 27.22037    | 4.79923        |
|       | a2* | -0.39137    | 0.60865        |
|       | a3* | -0.37132    | 0.08528        |
|       | a4* | 0.02798     | 0.00643        |
|       | a5* | -7.43025E-4 | 1.76062E-4     |
|       | b0* | 10.2266     | 0.03934        |
|       | b1* | -0.09457    | 0.01641        |
|       | b2* | 0.0088      | 0.00147        |
|       | k   | 273         | 0              |
| k     | 295 | 0           |                |



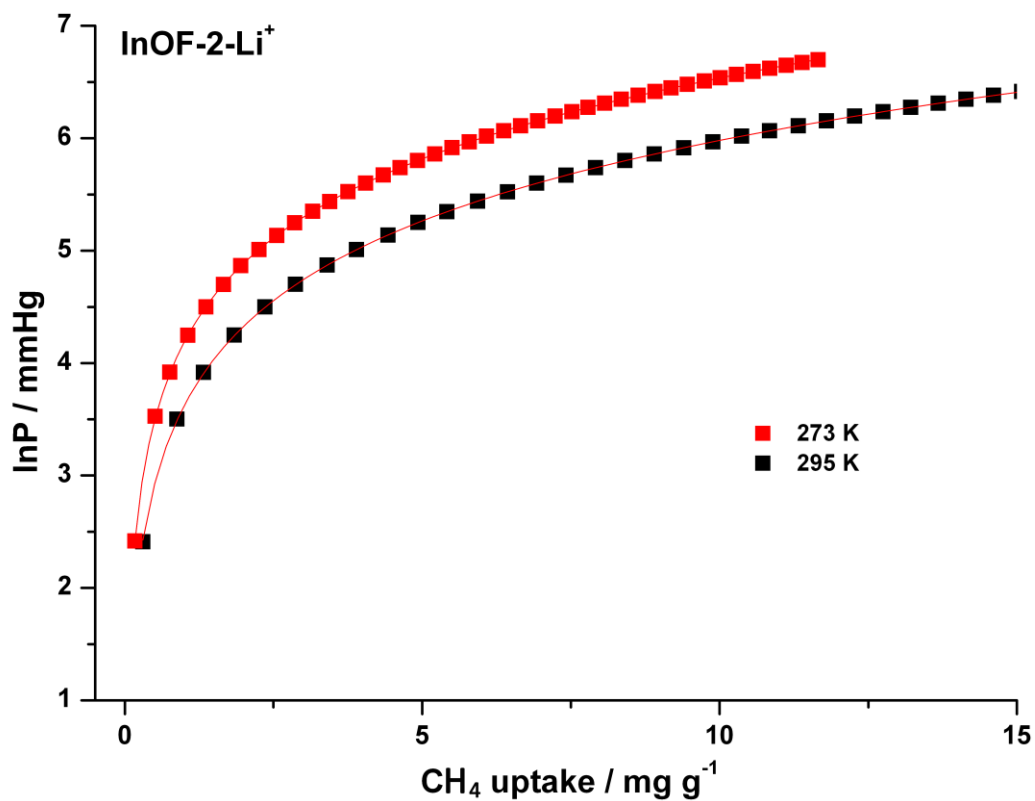

**Figure S23.** Nonlinear curve fitting of CH<sub>4</sub> adsorption isotherms for **InOF-2-Li<sup>+</sup>** at 273 K and 295 K.

$$y = \ln(x) + 1/k * (a_0 + a_1 * x + a_2 * x^2 + a_3 * x^3 + a_4 * x^4 + a_5 * x^5) + (b_0 + b_1 * x + b_2 * x^2)$$

|       |     | Value       | Standard Error |
|-------|-----|-------------|----------------|
| ln(P) | a0* | -2086.46801 | 9.35212        |
|       | a1* | 21.94707    | 3.48978        |
|       | a2* | -1.84202    | 0.32171        |
|       | a3* | 0.03371     | 0.02612        |
|       | a4* | -0.00139    | 0.0015         |
|       | a5* | 2.27766E-5  | 3.11054E-5     |
|       | b0* | 11.25707    | 0.03261        |
|       | b1* | -0.06745    | 0.01207        |
|       | b2* | 0.00528     | 9.42871E-4     |
|       | k   | 273         | 0              |
| k     | 295 | 0           |                |

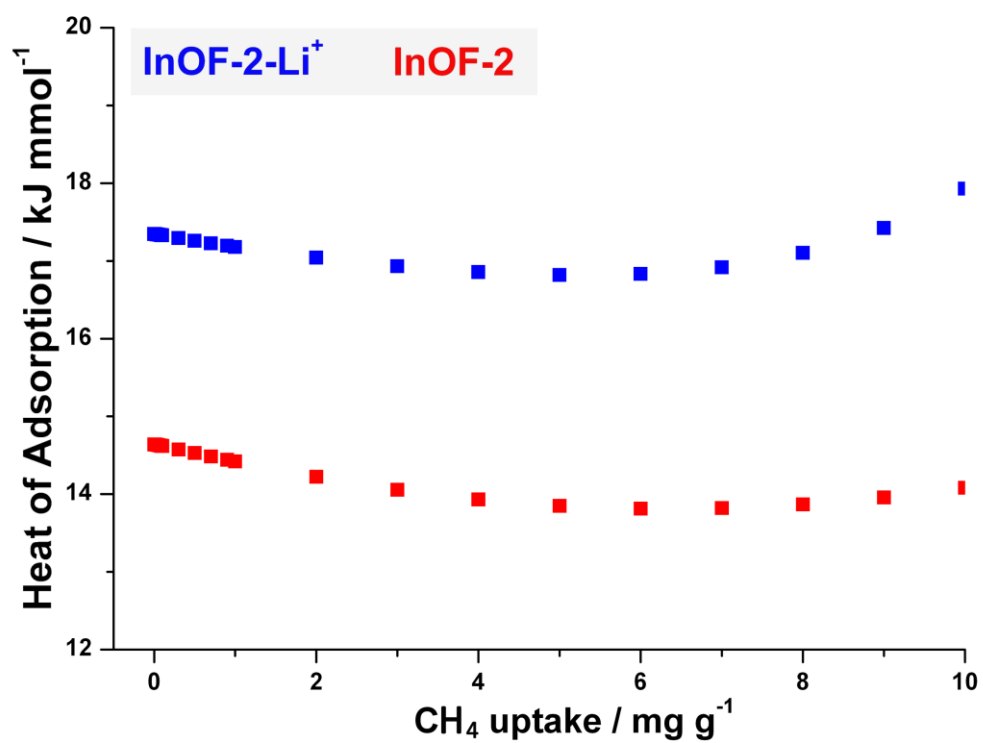

Figure S24. CH<sub>4</sub> heat of adsorption for InOF-2-Li<sup>+</sup> (blue) and InOF-2 (red).

## S9. Single gas adsorption measurements

### 9.1. H<sub>2</sub> uptake measurements

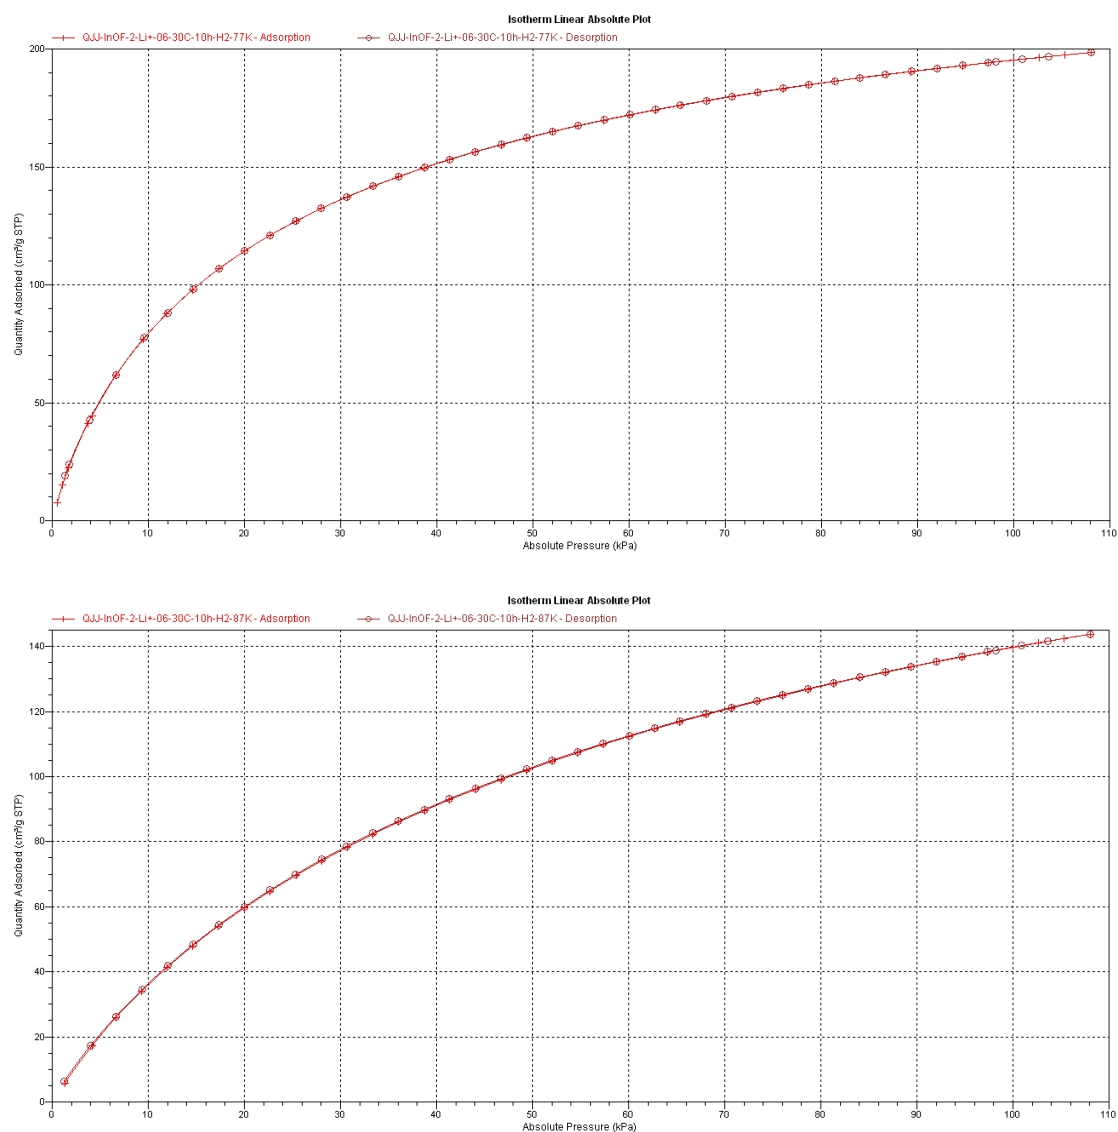

**Figure S25.** At 273/295 K, H<sub>2</sub> sorption of I InOF-2-Li<sup>+</sup> activated at 303 K for 10h.

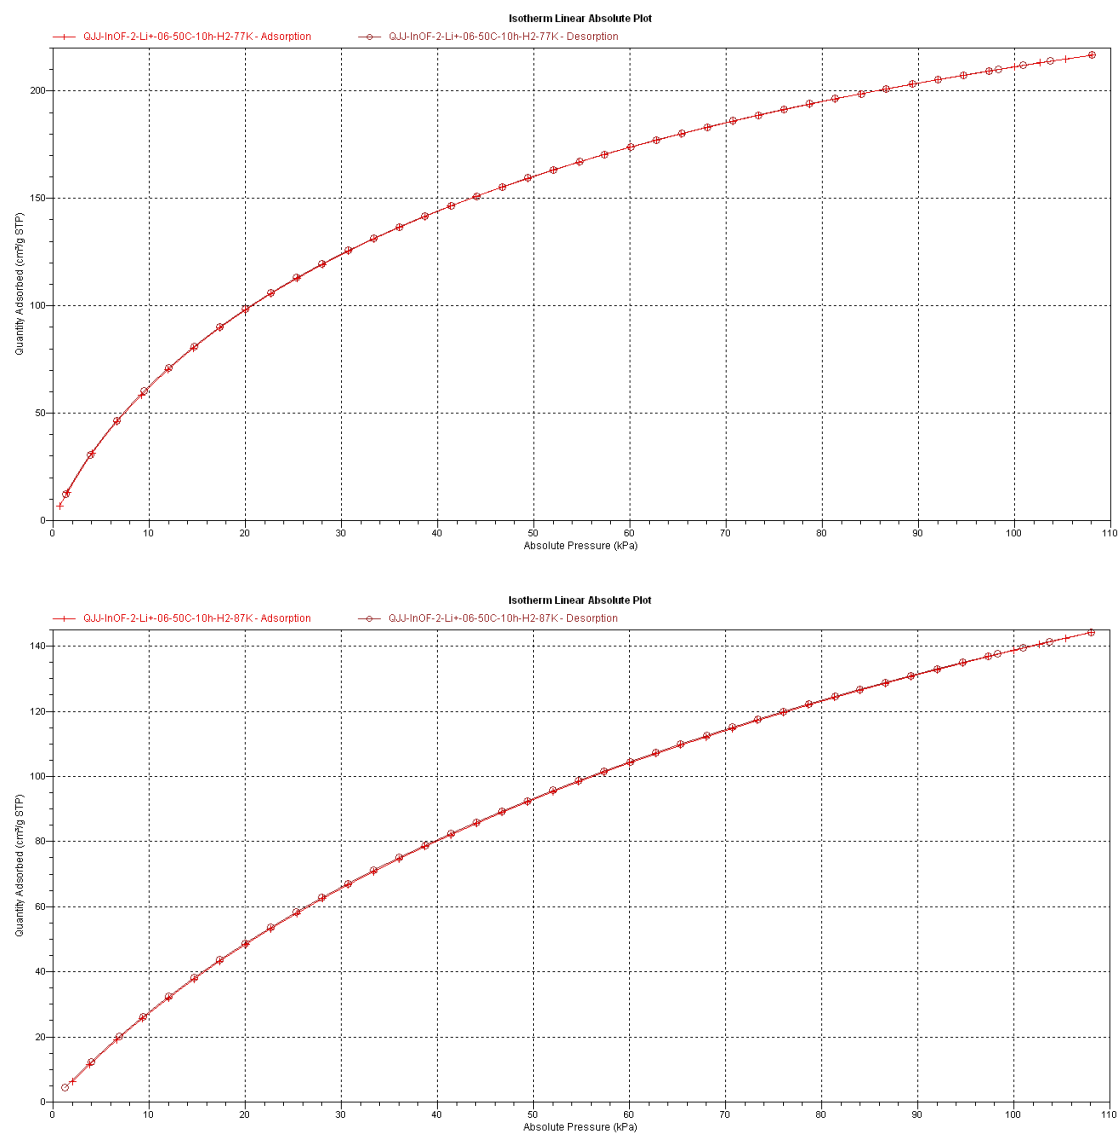

**Figure S26.** At 273/295 K, H<sub>2</sub> sorption of I InOF-2-Li<sup>+</sup> activated at 323 K for 10h.

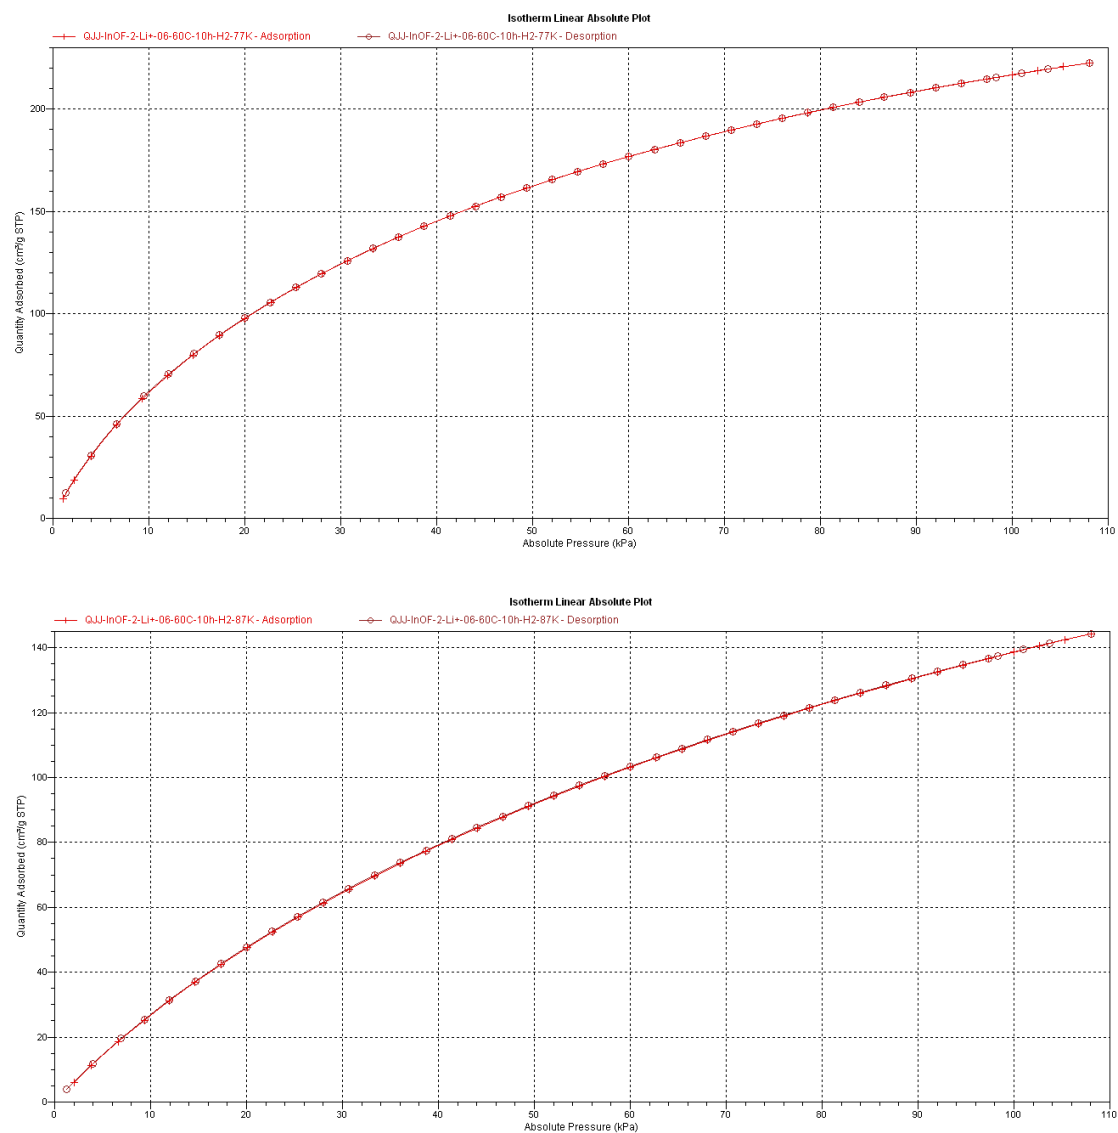

**Figure S27.** At 273/295 K, H<sub>2</sub> sorption of I InOF-2-Li<sup>+</sup> activated at 333 K for 10h.

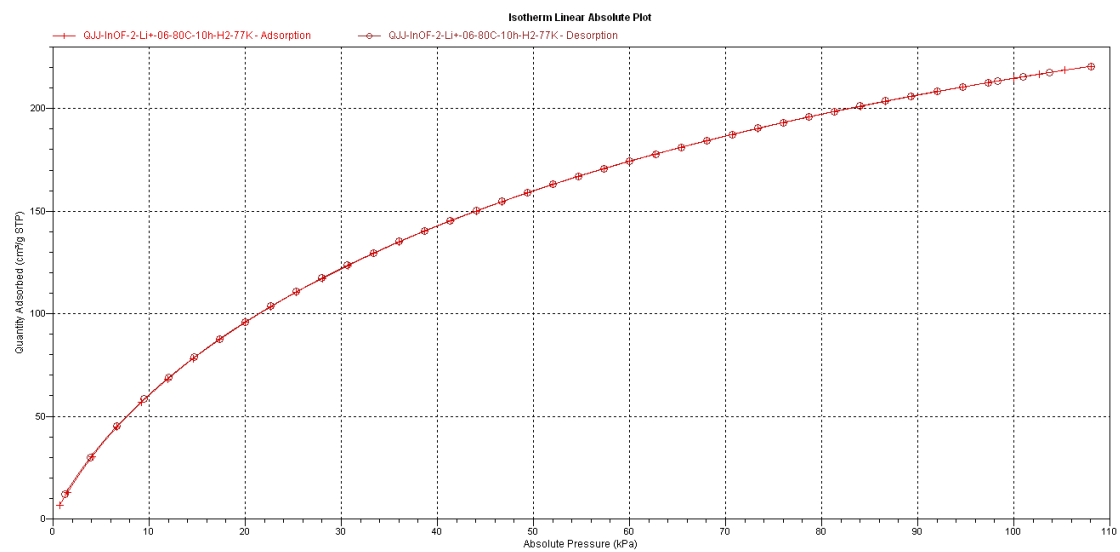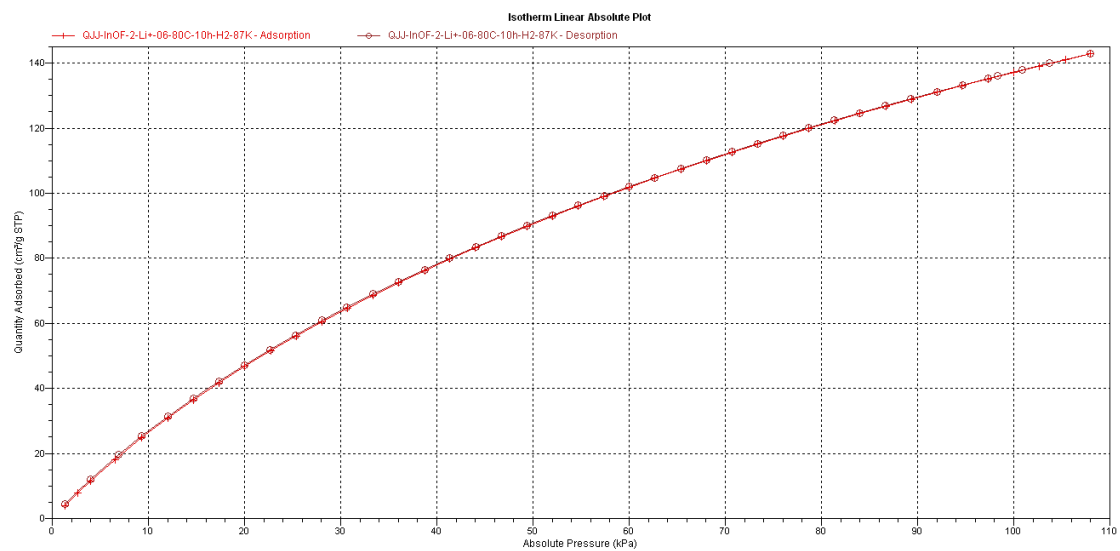

**Figure S28.** At 273/295 K, H<sub>2</sub> sorption of I InOF-2-Li<sup>+</sup> activated at 353 K for 10h.

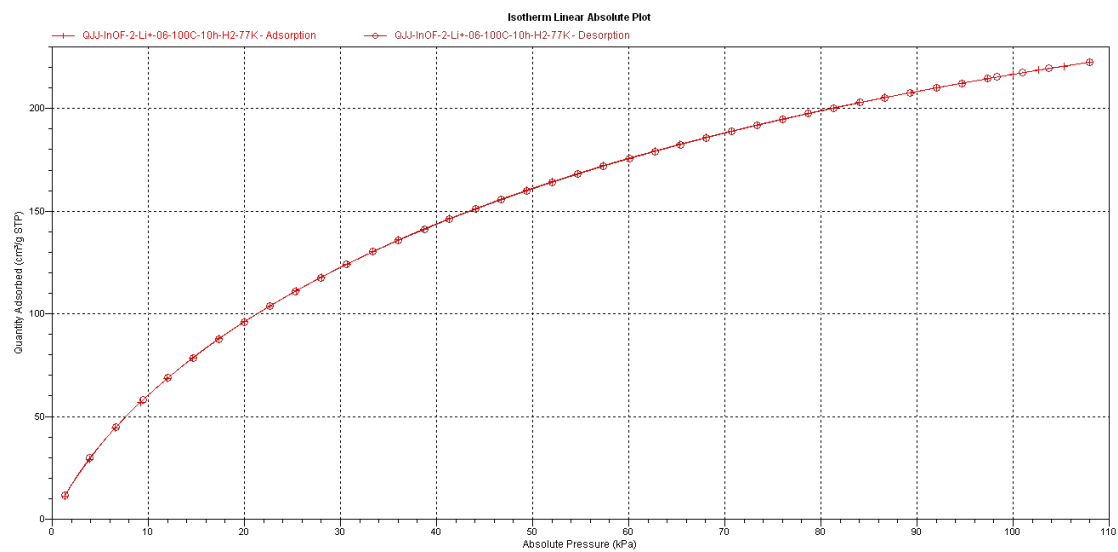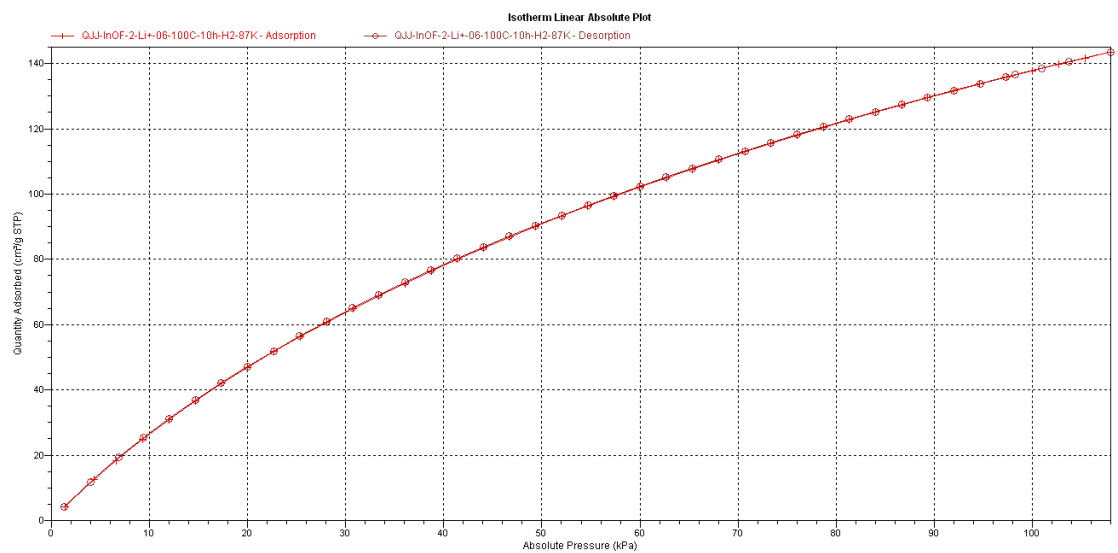

Figure S29. At 273/295 K, H<sub>2</sub> sorption of I InOF-2-Li<sup>+</sup> activated at 373 K for 10h.

## 9.2. CO<sub>2</sub> uptake measurements

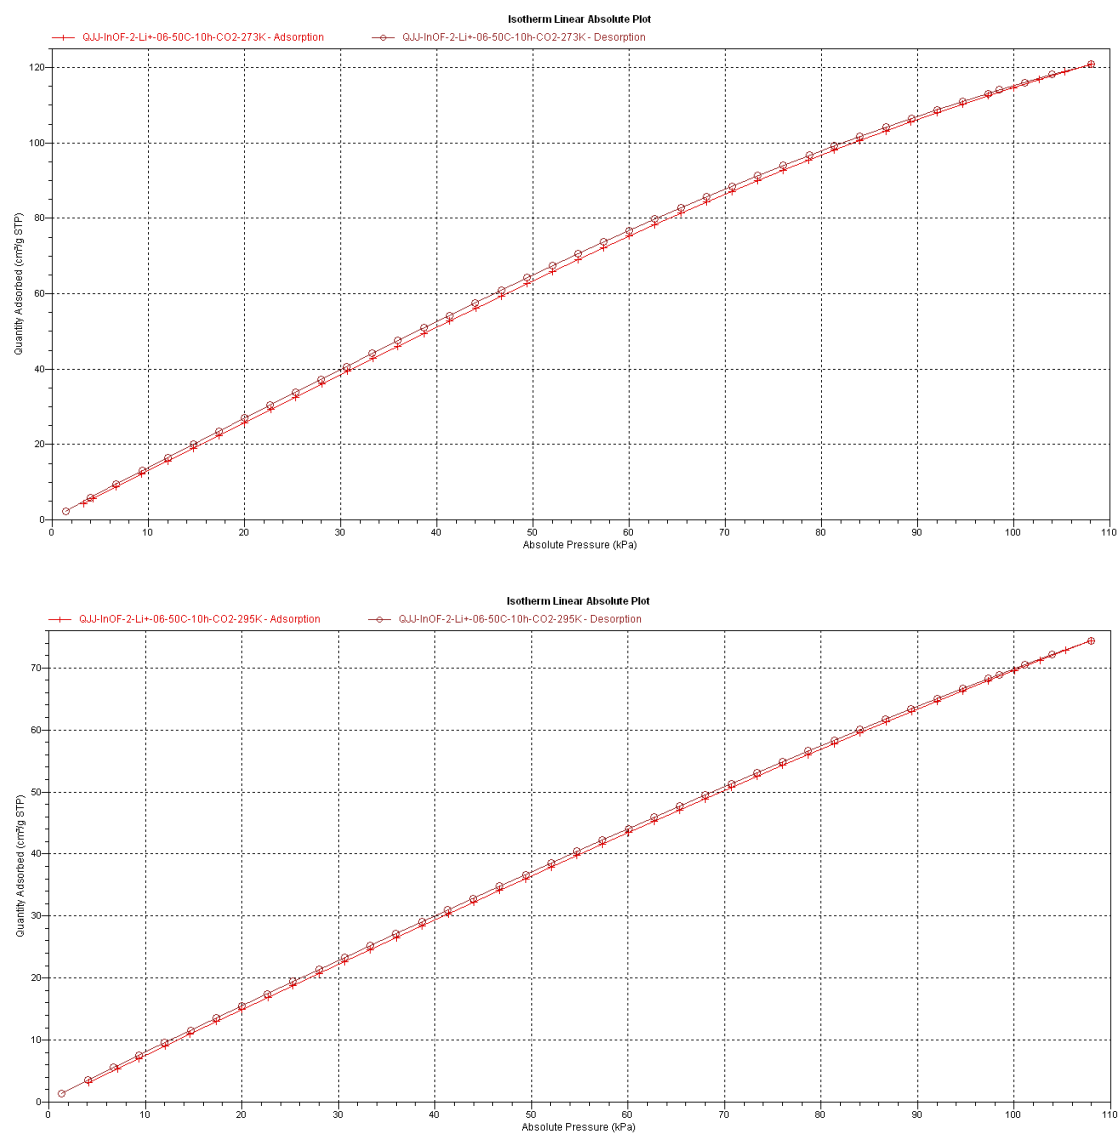

**Figure S30.** At 273/295 K, CO<sub>2</sub> sorption of I InOF-2-Li<sup>+</sup> activated at 323 K for 10h.



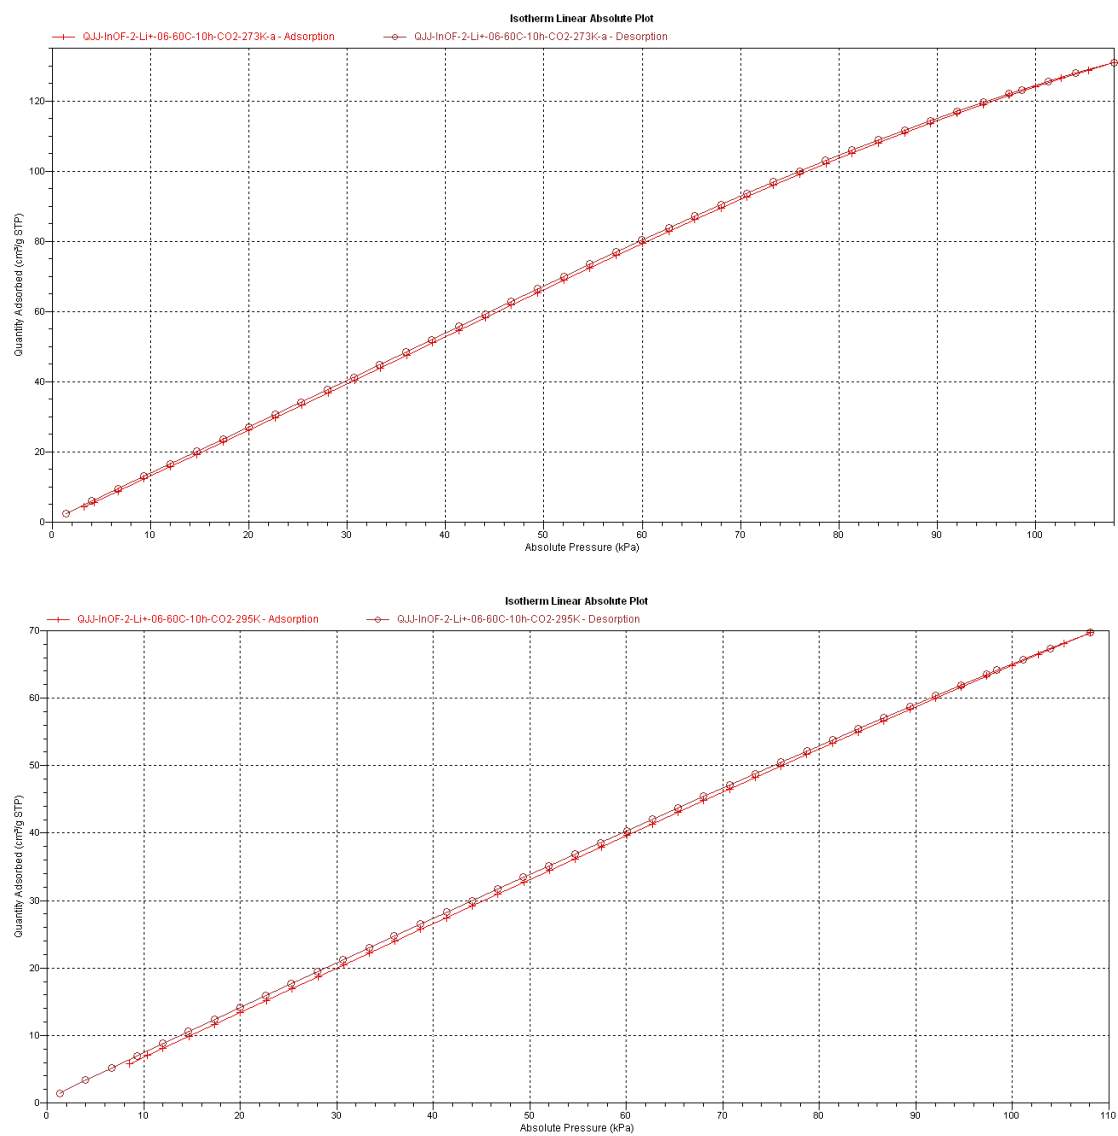

**Figure S31.** At 273/295 K, CO<sub>2</sub> sorption of I InOF-2-Li<sup>+</sup> activated at 333 K for 10h.

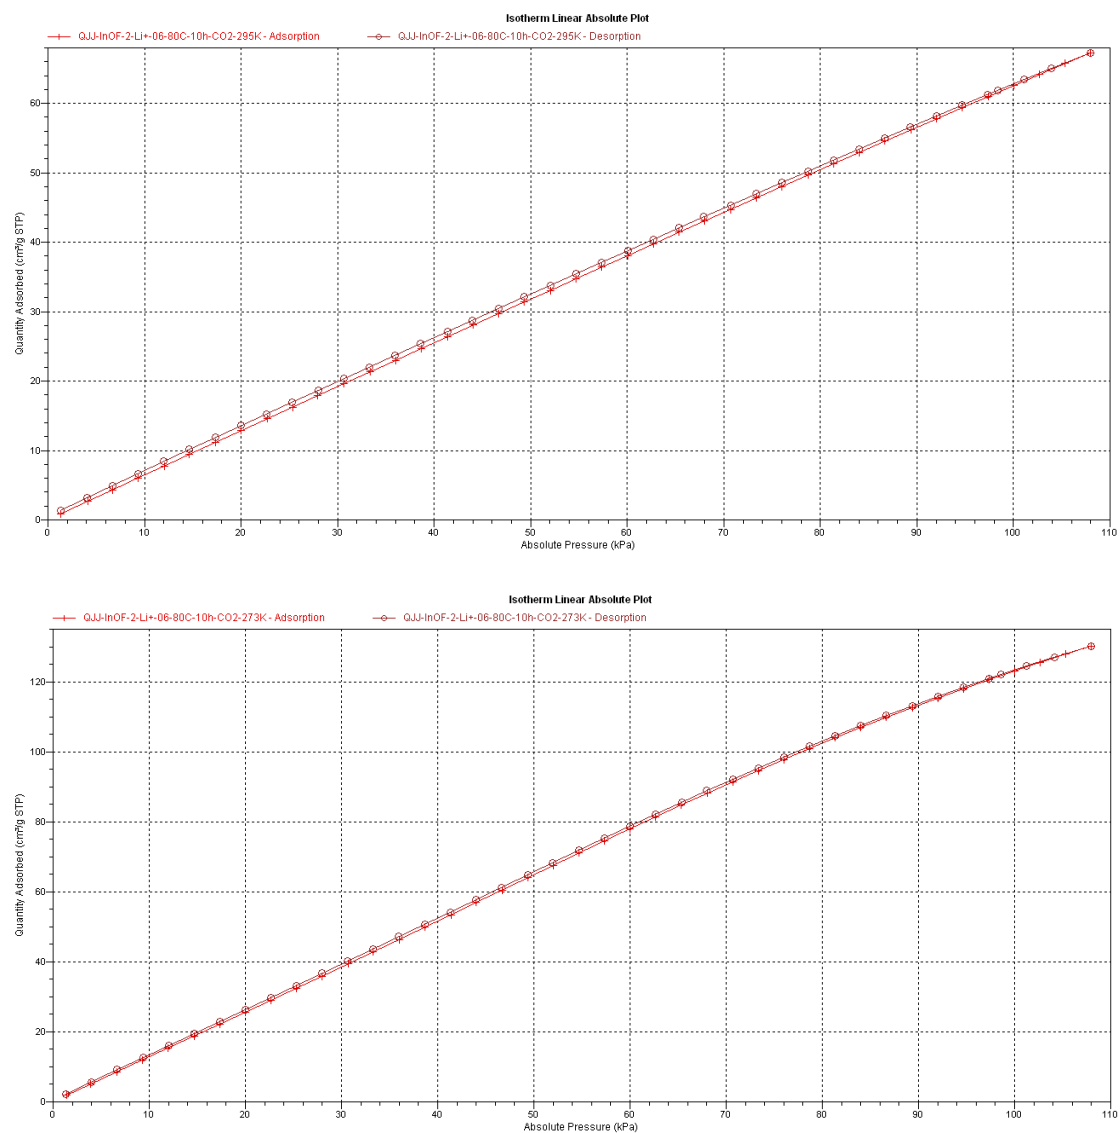

**Figure S32.** At 273/295 K, CO<sub>2</sub> sorption of I  $\text{InOF-2-Li}^+$  activated at 353 K for 10h.

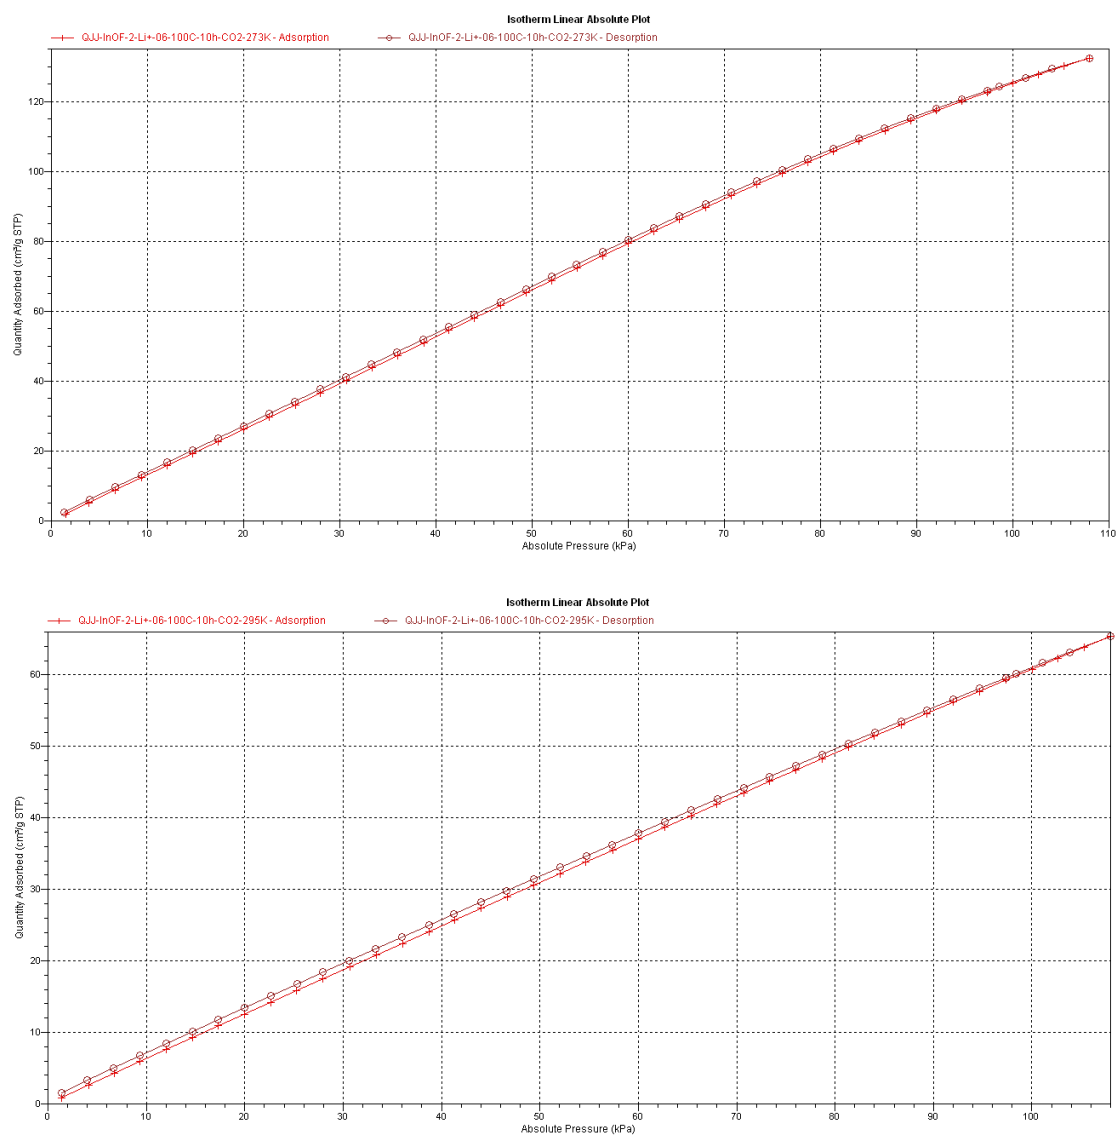

**Figure S33.** At 273/295 K, CO<sub>2</sub> sorption of I InOF-2-Li<sup>+</sup> activated at 373 K for 10h.

### 9.3. CH<sub>4</sub> uptake measurements

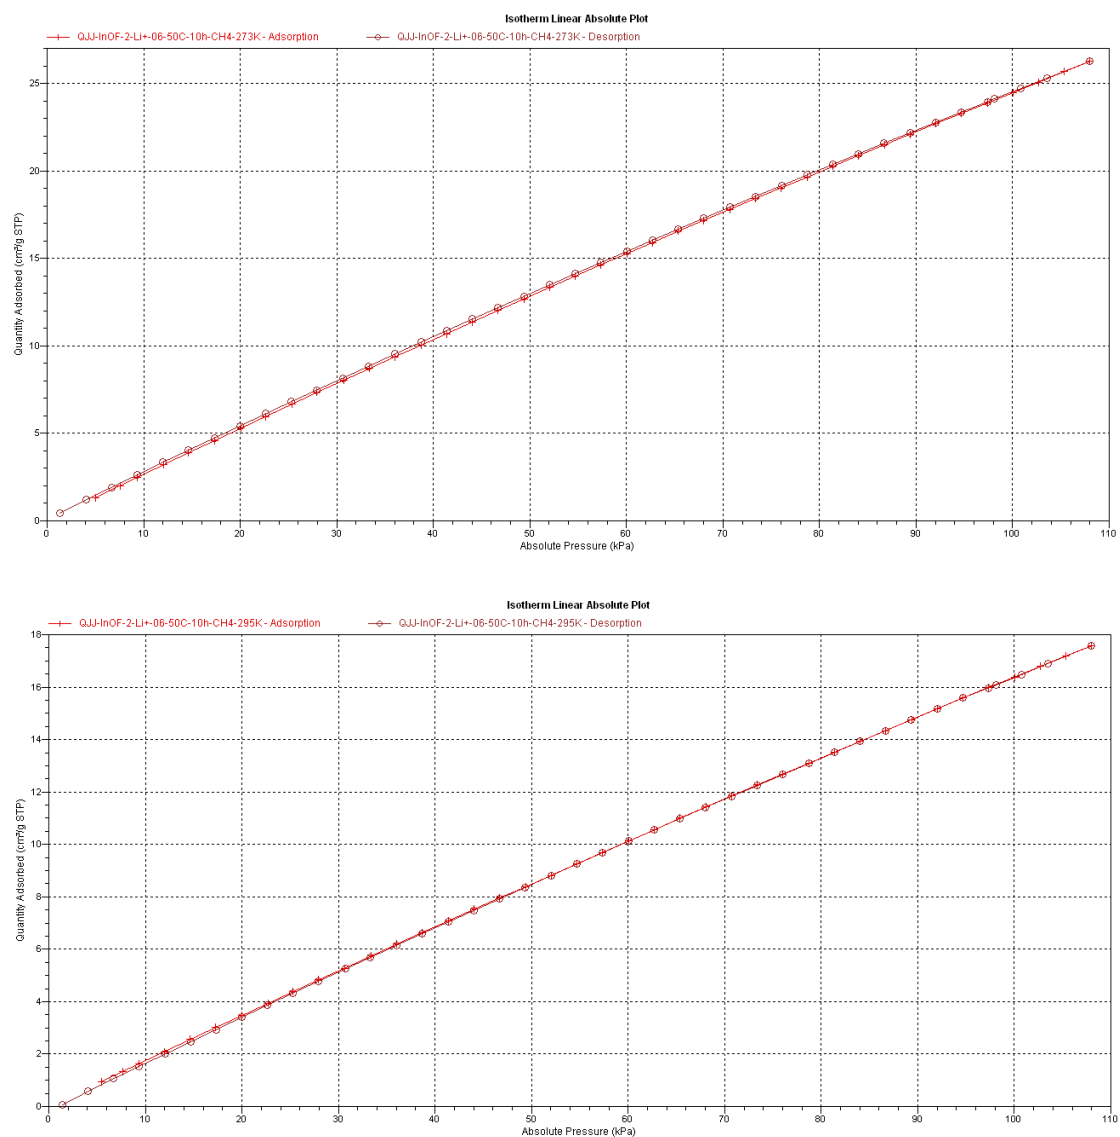

**Figure S34.** At 273/295 K, CH<sub>4</sub> sorption of I InOF-2-Li<sup>+</sup> activated at 323 K for 10h.

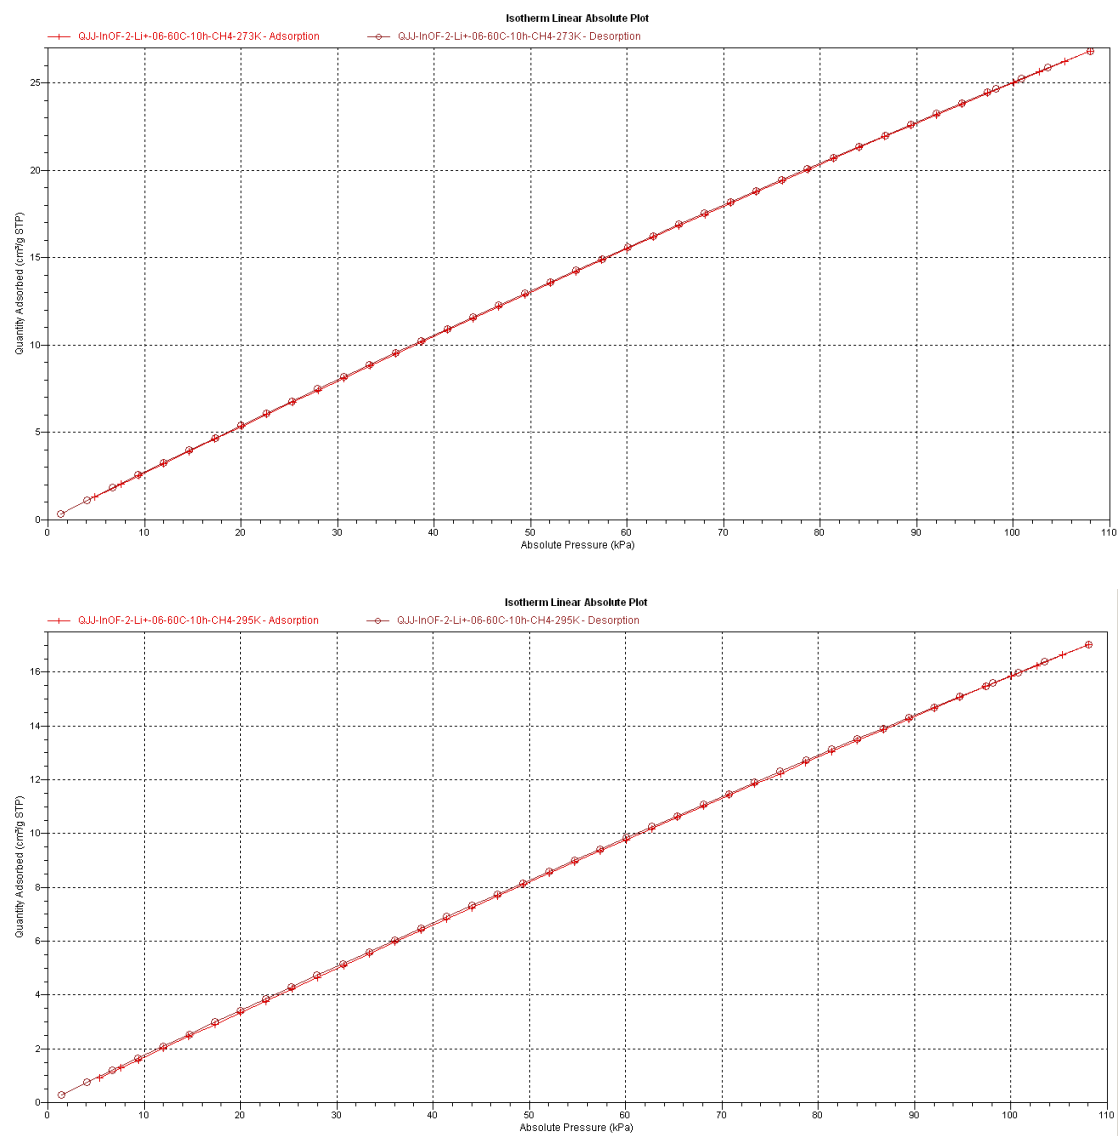

**Figure S35.** At 273/295 K, CH<sub>4</sub> sorption of I InOF-2-Li<sup>+</sup> activated at 333 K for 10h.

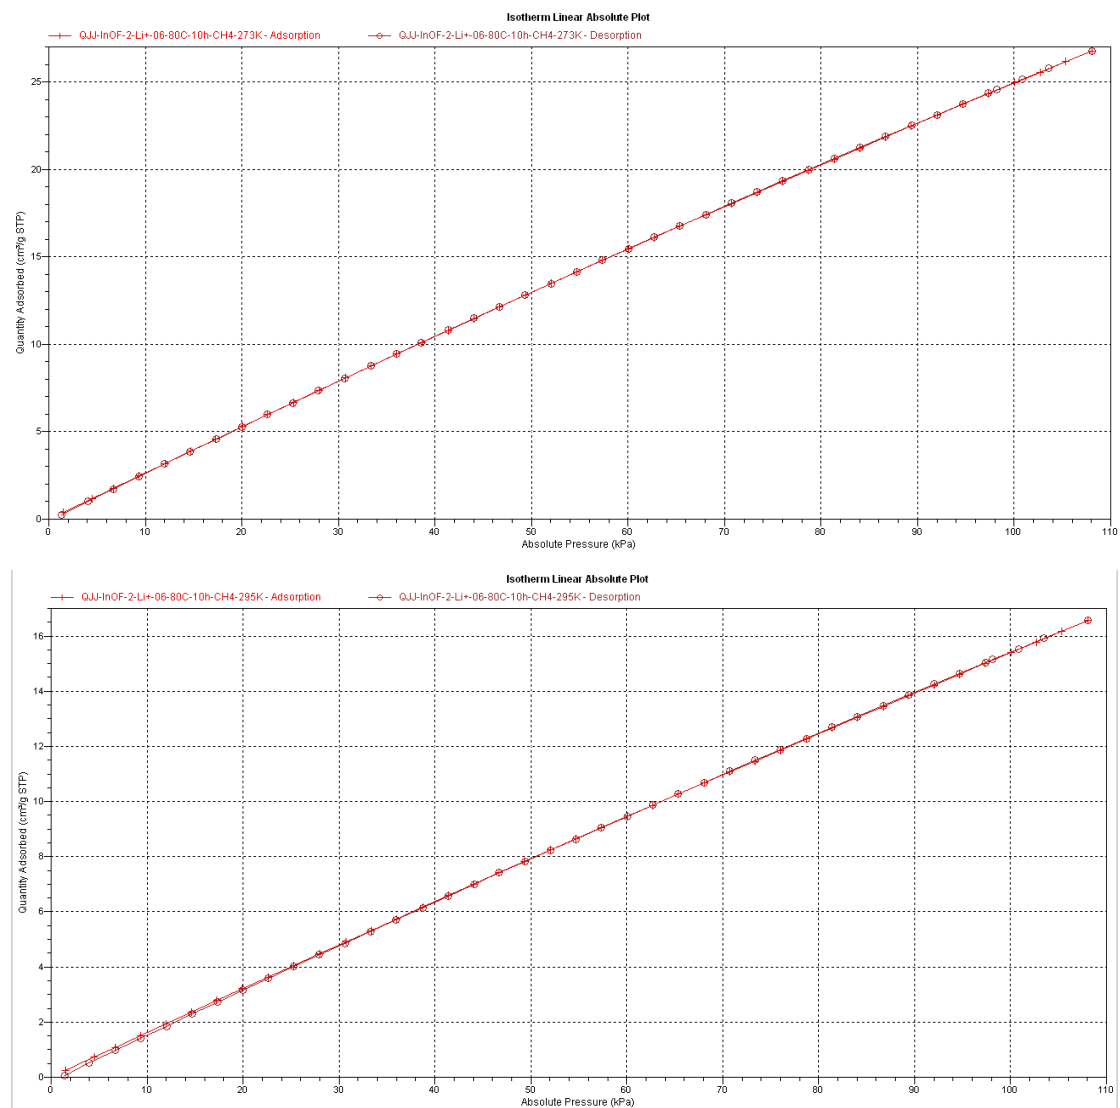

Figure S36. At 273/295 K, CH<sub>4</sub> sorption of I InOF-2-Li<sup>+</sup> activated at 353 K for 10h.

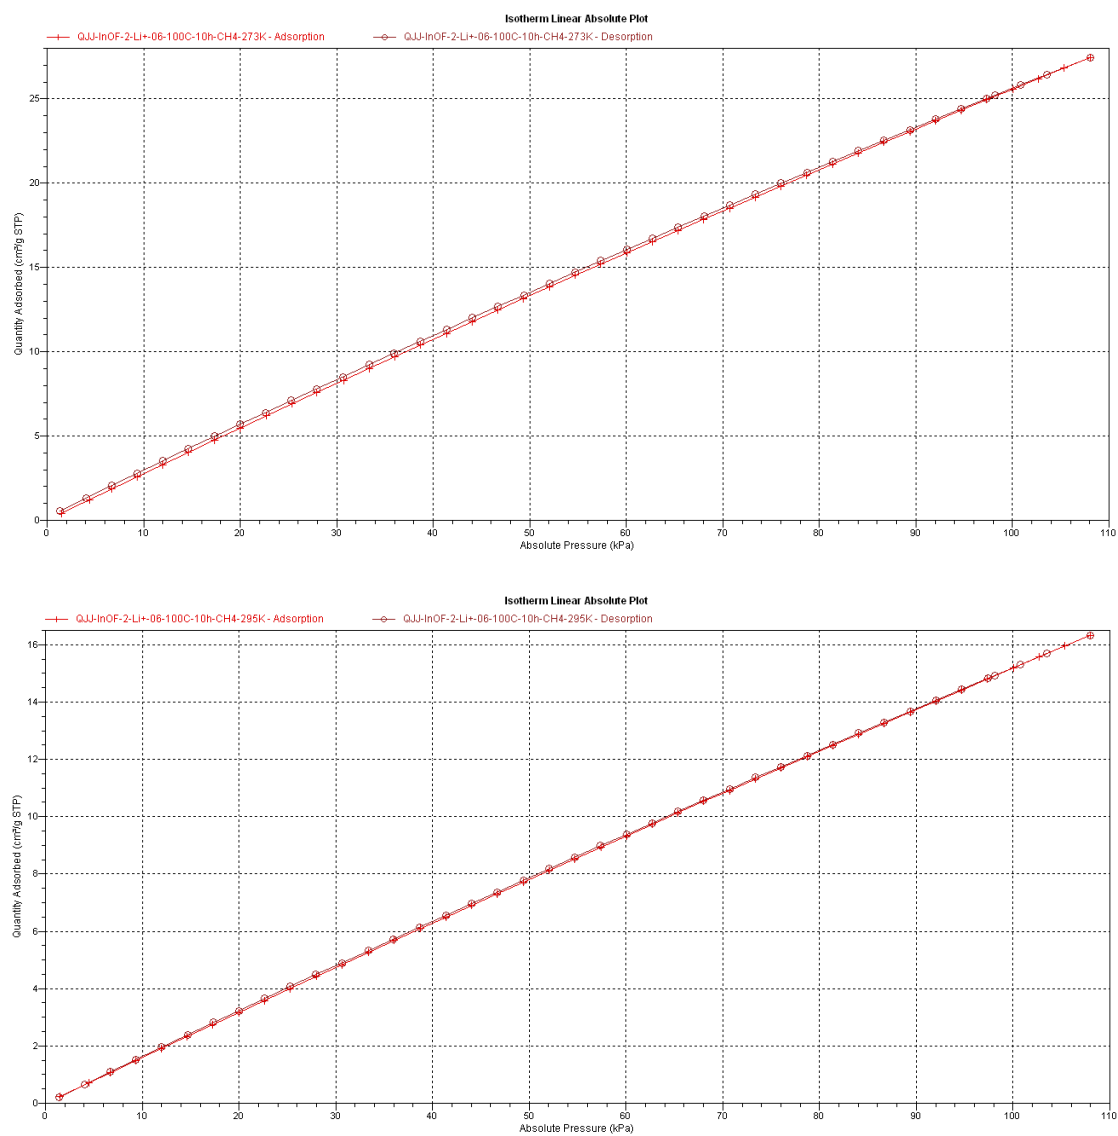

**Figure S37.** At 273/295 K, CH<sub>4</sub> sorption of I InOF-2-Li<sup>+</sup> activated at 373 K for 10h.

## 9.4. N<sub>2</sub> uptake measurements

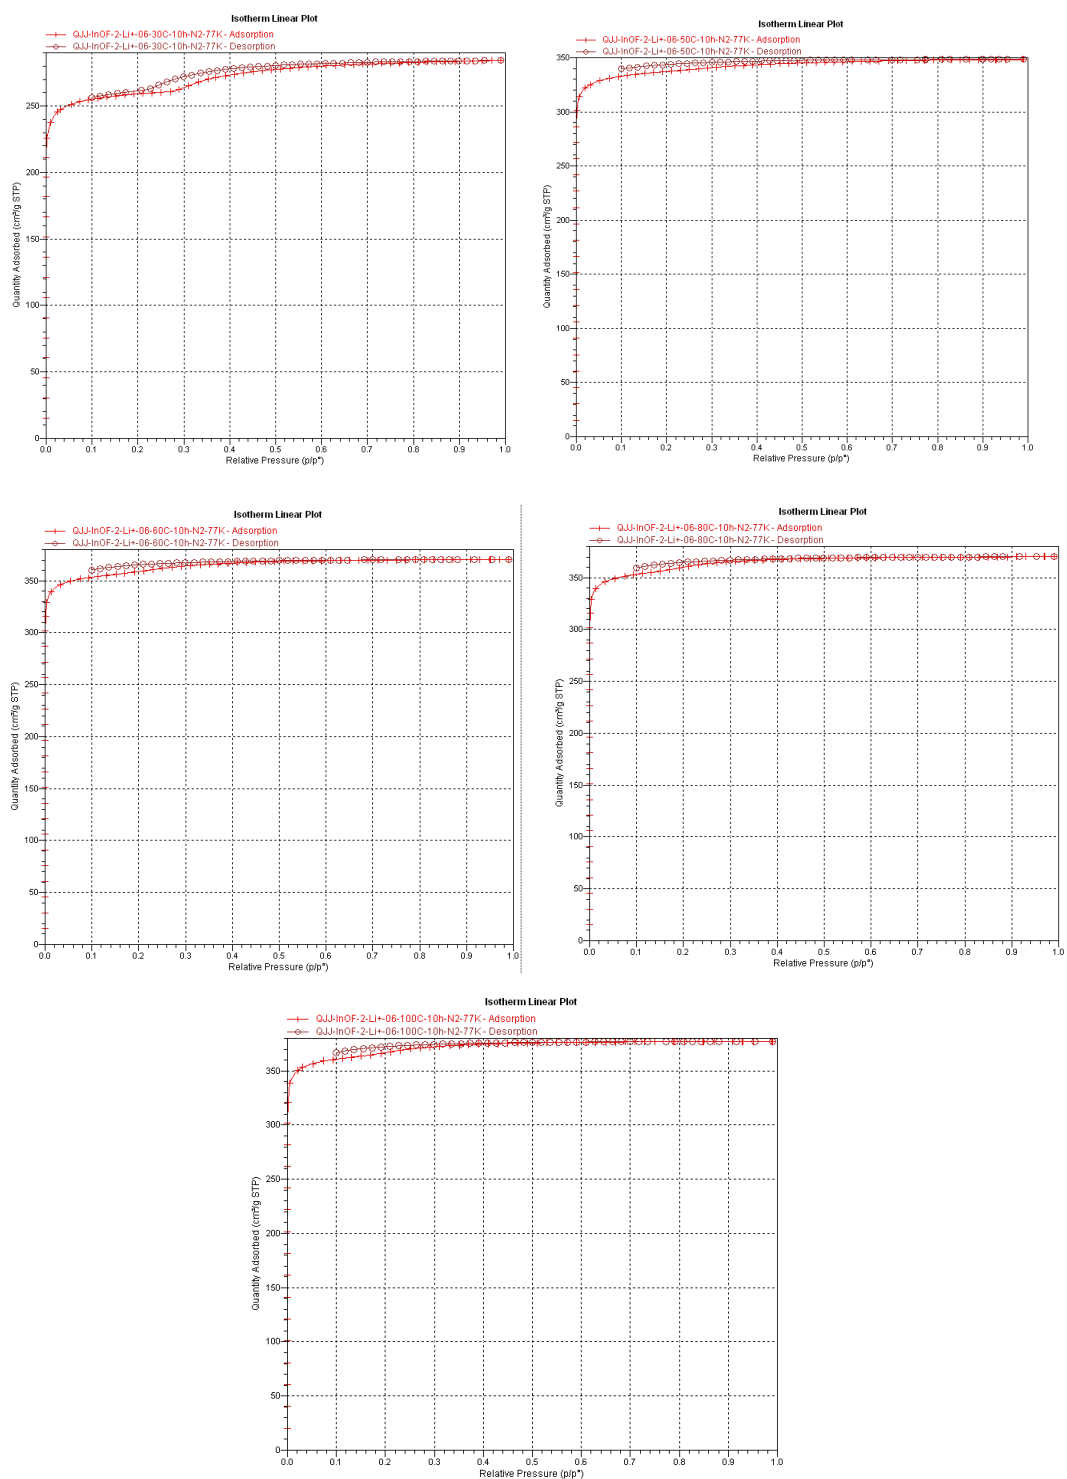

**Figure S38.** At 77 K, N<sub>2</sub> sorption of I InOF-2-Li<sup>+</sup> activated at from 303 to 373 K for 10h.



## S10. References.

[S1]. Yang, S.; Lin, X.; Blake, A. J.; Thomas, K. M.; Hubberstey, P.; Champness, N.

R.; Schroder, M., *Chem. Commun.* **2008**, 6108.

[S2]. Qian, J. J.; Jiang, F. L.; Yuan, D. Q.; Wu, M. Y.; Zhang, S. Q.; Zhang, L. J.;

Hong, M. C., *Chem. Commun.* 2012, **48**, 9696-9698.

[S3] Sheldrick, G. M. SHELXS-97, Programs for X-ray Crystal Structure Solution;

University of Göttingen: Germany, **1997**.

[S4] (a) A. L. Spek, *J. Appl. Crystallogr.* **2003**, *36*, 7; (b) P. v.d. Sluis and A. L. Spek,

*Acta Crystallogr., Sect. A*, **1990**, *46*, 194.

[S5] ASAP 2020 Accelerated Surface Area and Porosimetry System Operator's

Manual V4.00, Appendix C, C-43.
